# Supplementary material
Source: PubMed Central journal article supplement (PMC4628567)
Supplement: NIHMS726482-supplement-supplement_1.pdf [file NIHMS726482-supplement-supplement_1.pdf]

### Bland-Altman Plot

#### Lower Extremity (Mobility) - short form

Difference

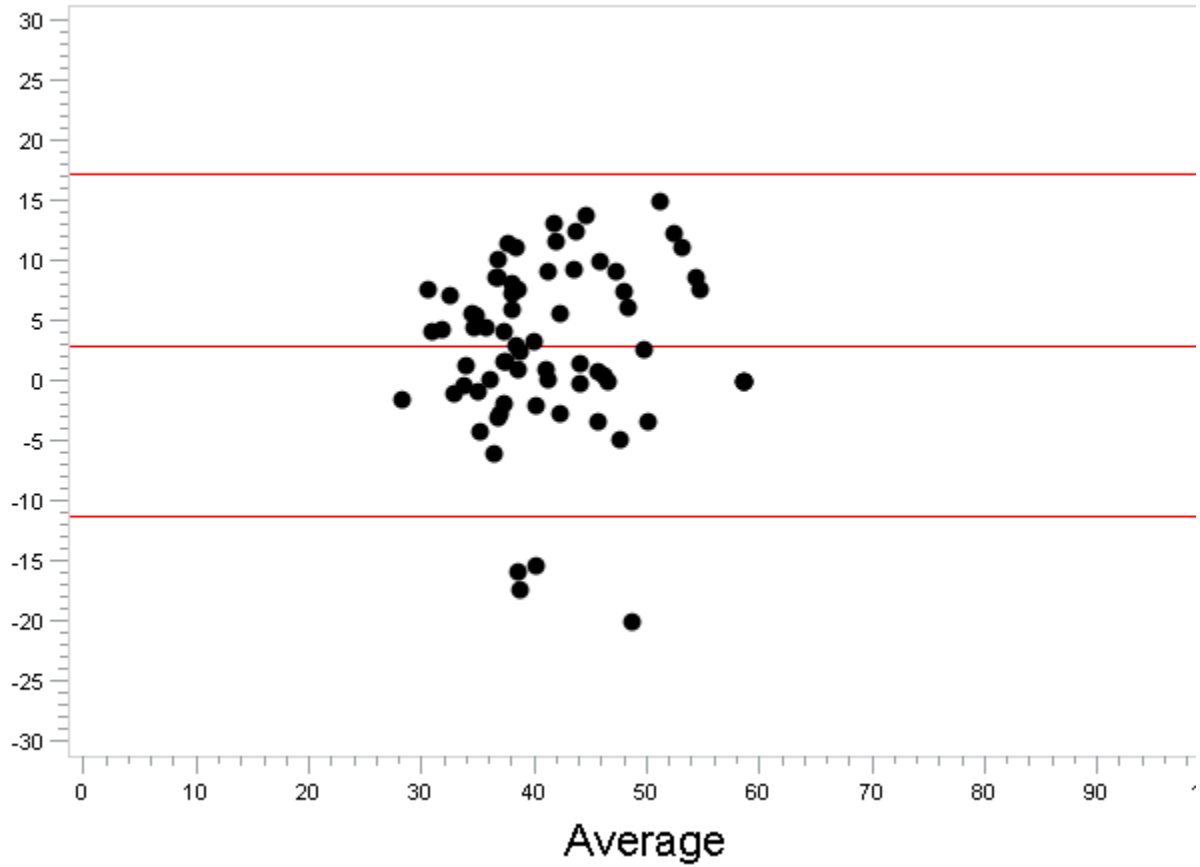

UL: 17.18

LL: -11.28

Mean Diff: 2.95

## BLAND-ALTMAN PLOTS FOR STROKE SELF/PROXY 4/18/2014

### Note on Differences:

Difference is calculated as self minus proxy. Negative differences indicate the proxy scores are higher than self scores. Positive differences indicate the proxy scores are lower than self scores.

### Bland-Altman Plot

#### Ability to Participate in Social Roles and Activities - short form

Difference

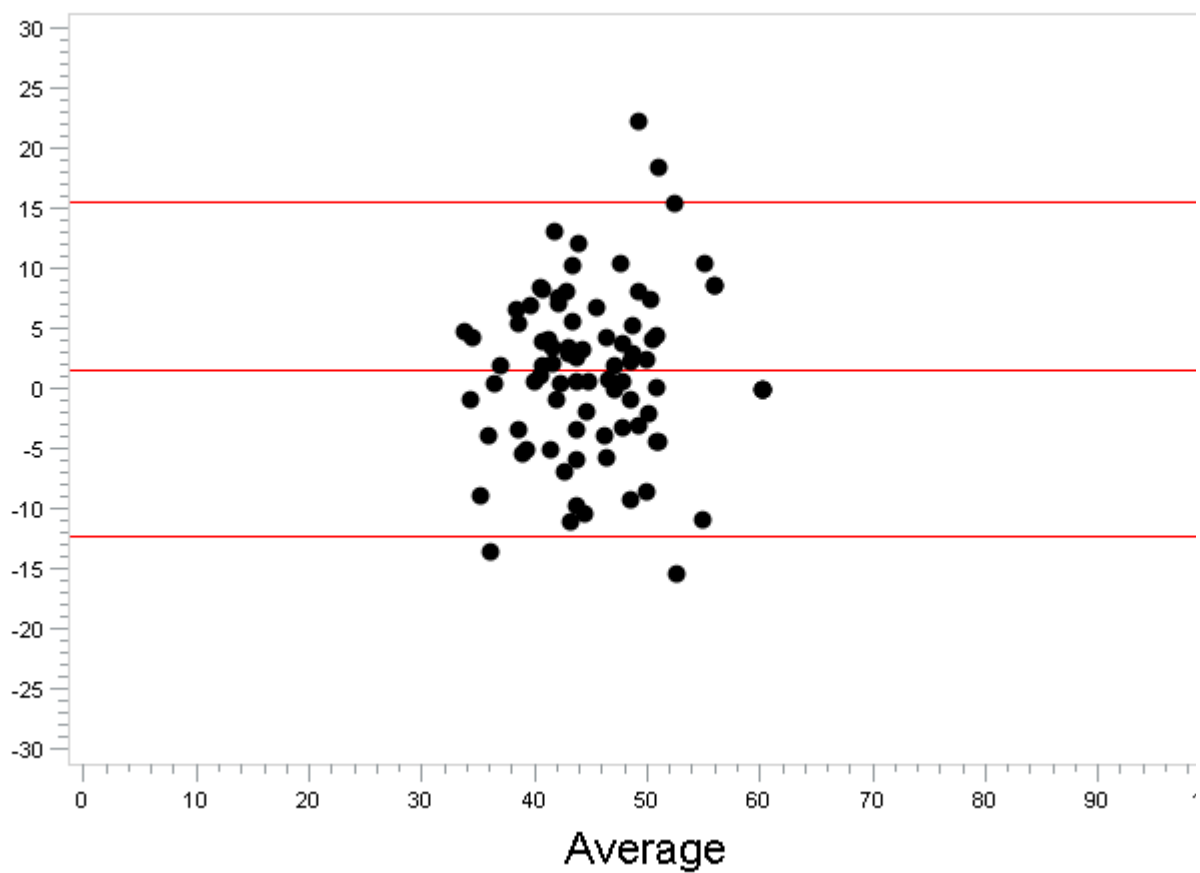

UL: 15.47

LL: -12.26

Mean Diff: 1.60

### Bland-Altman Plot

#### Applied Cognition- Executive Function - short form

Difference

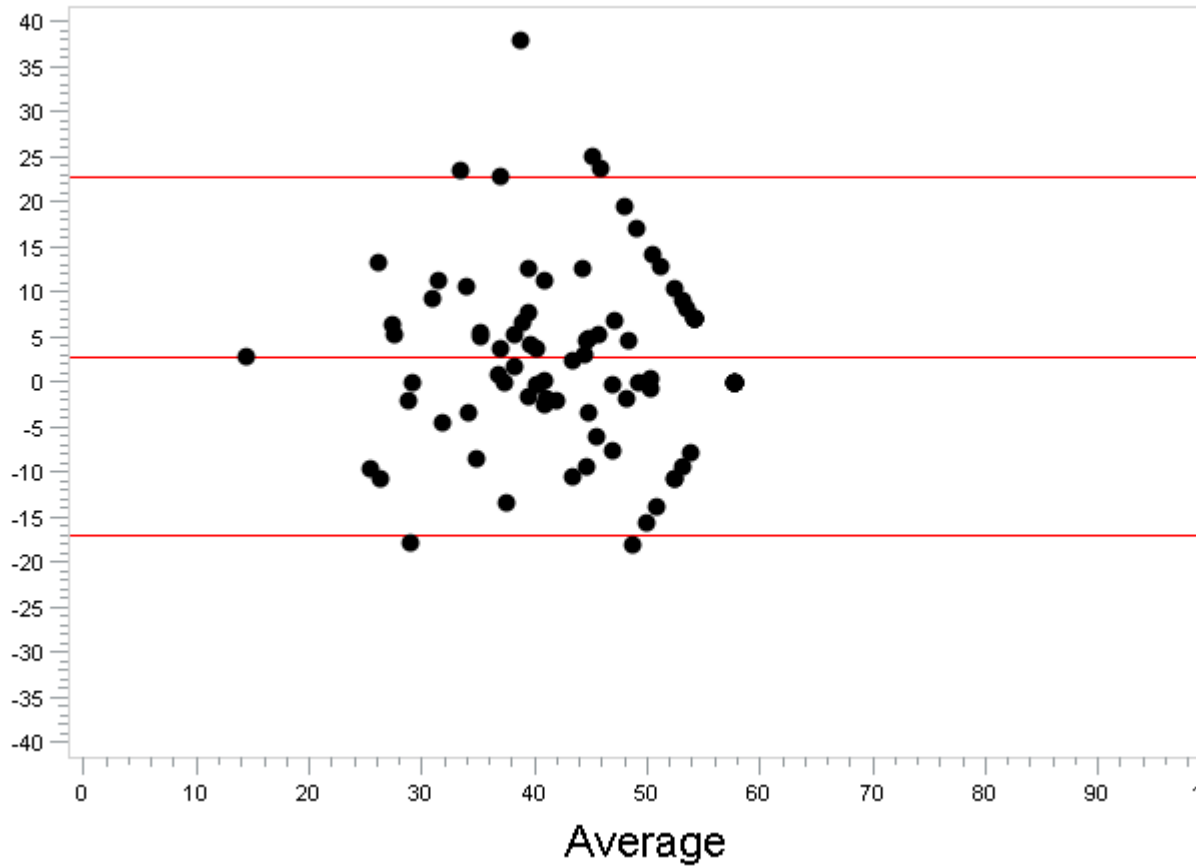

UL:22.69

LL: -17.14

Mean Diff: 2.78

### Bland-Altman Plot

### Applied Cognition- General Concerns - short form

Difference

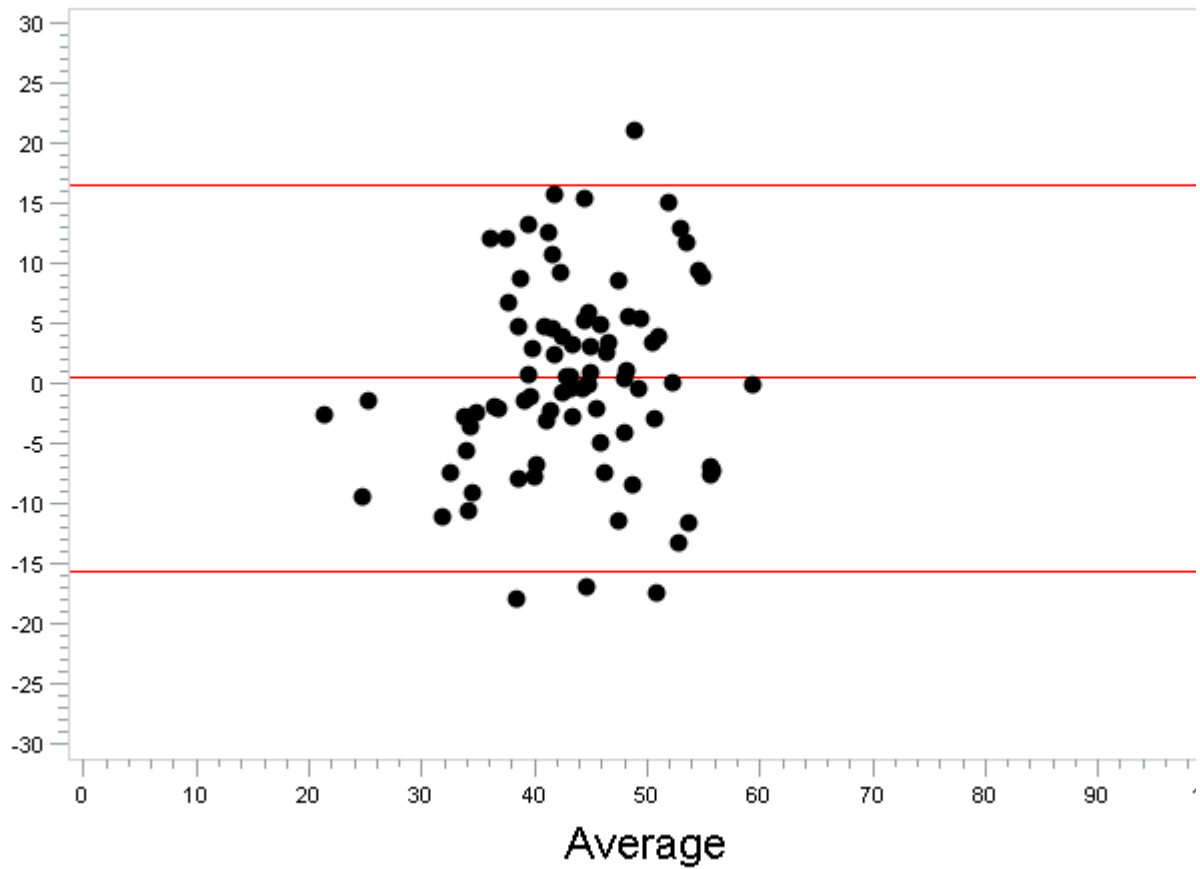

UL:16.62

LL:-15.54

Mean Diff:0.54

**Bland-Altman Plot**  
**Anxiety - short form**

Difference

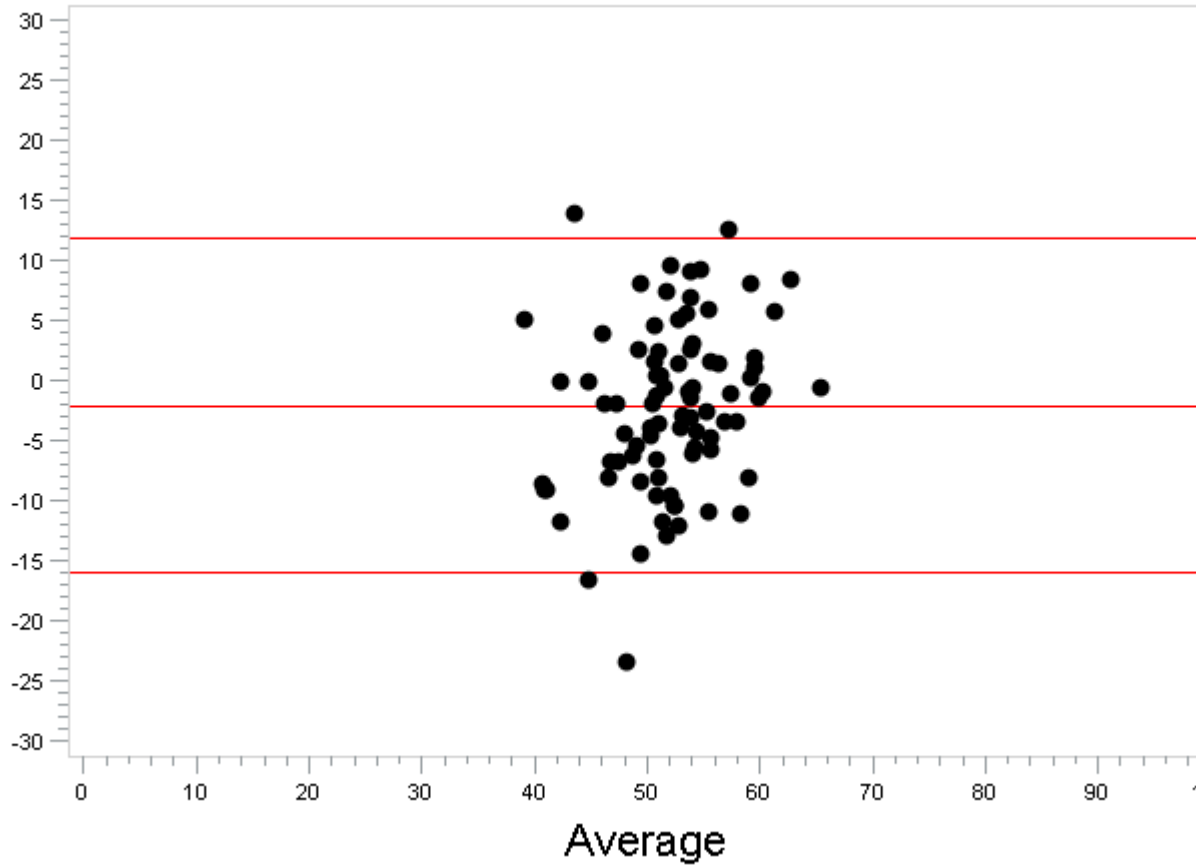

UL:11.88

LL: -15.95

Mean Diff: -2.03

**Bland-Altman Plot**  
**Depression - short form**

Difference

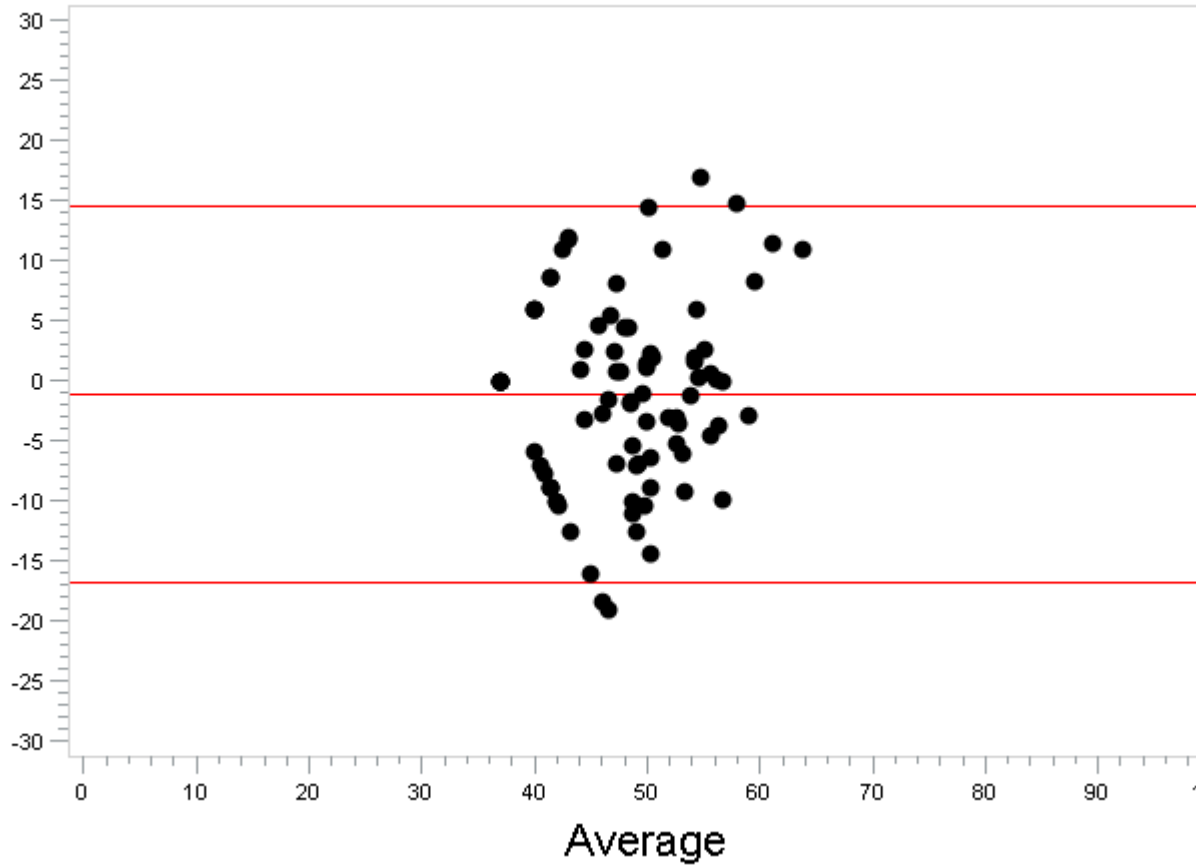

UL: 14.58

LL: -16.73

Mean Diff: -1.08

### Bland-Altman Plot

#### Emotional and Behavioral Dyscontrol - short form

Difference

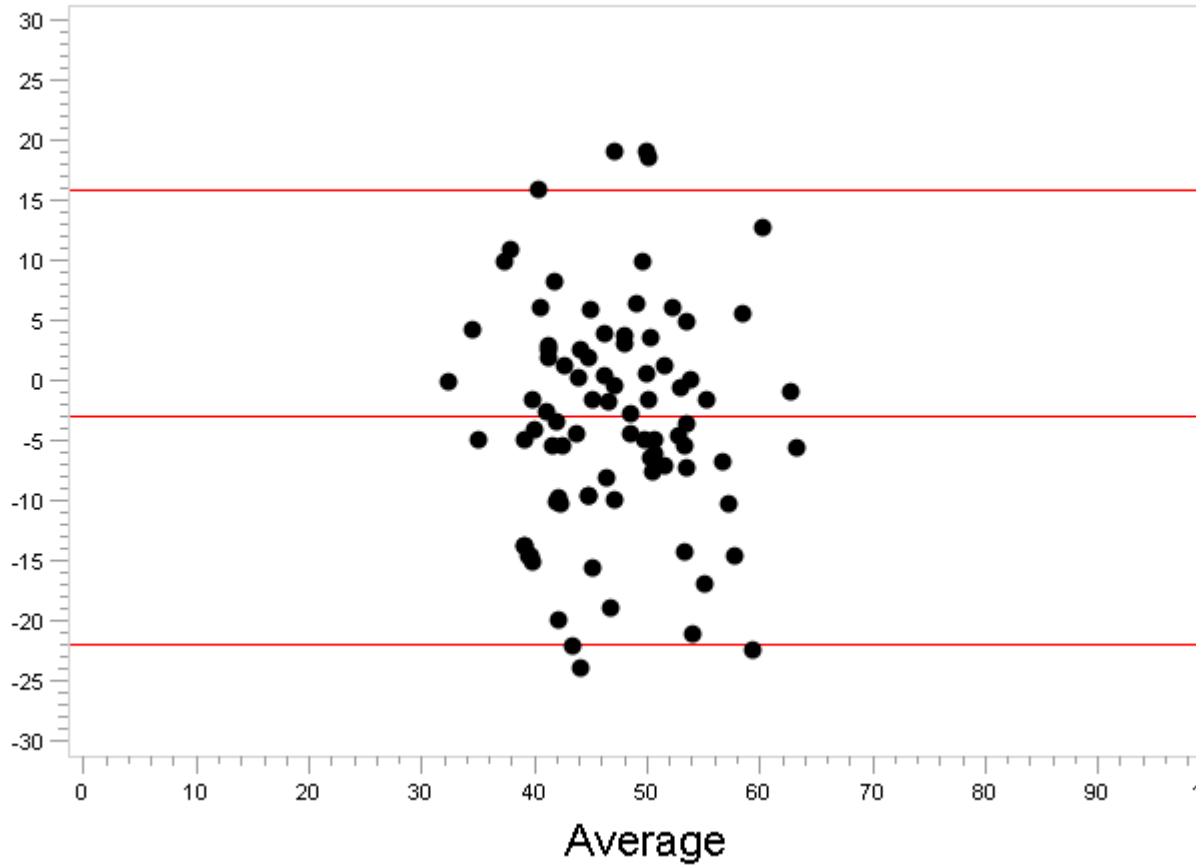

UL:15.83

LL: -21.85

Mean Diff: -3.01

**Bland-Altman Plot**  
**Fatigue - short form**

Difference

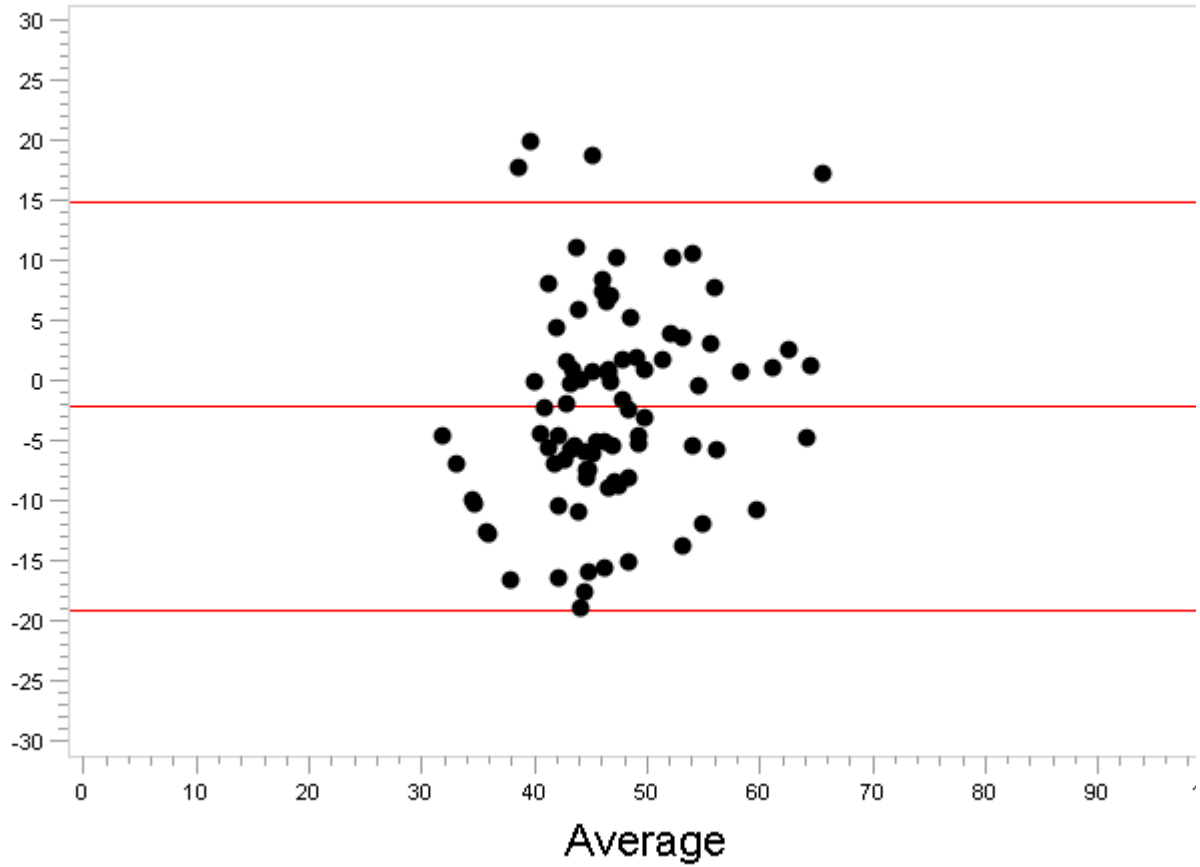

UL:14.96

LL: -19.09

Mean Diff: -2.06



### Bland-Altman Plot

#### Lower Extremity (Mobility) - short form

Difference

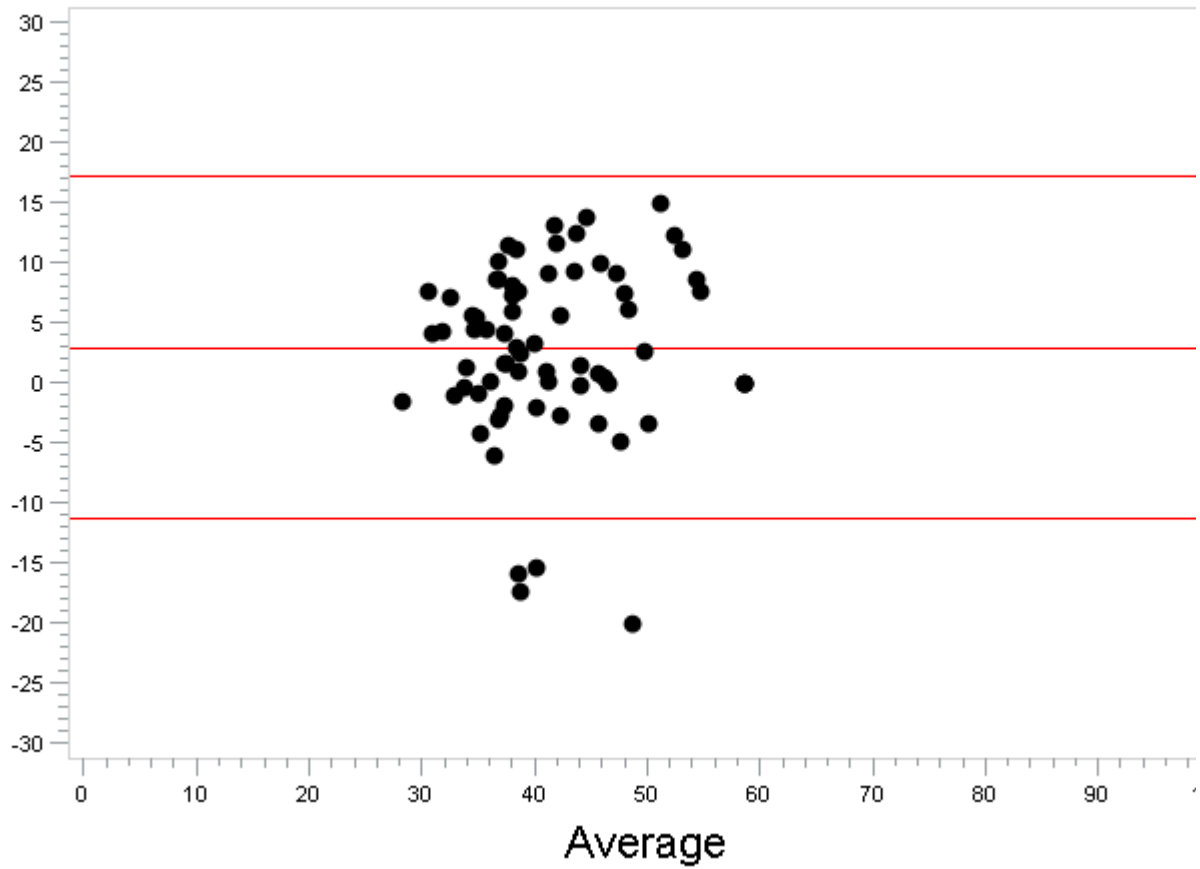

UL: 17.18

LL: -11.28

Mean Diff: 2.95

### Bland-Altman Plot

### Positive Affect and Well-Being - short form

Difference

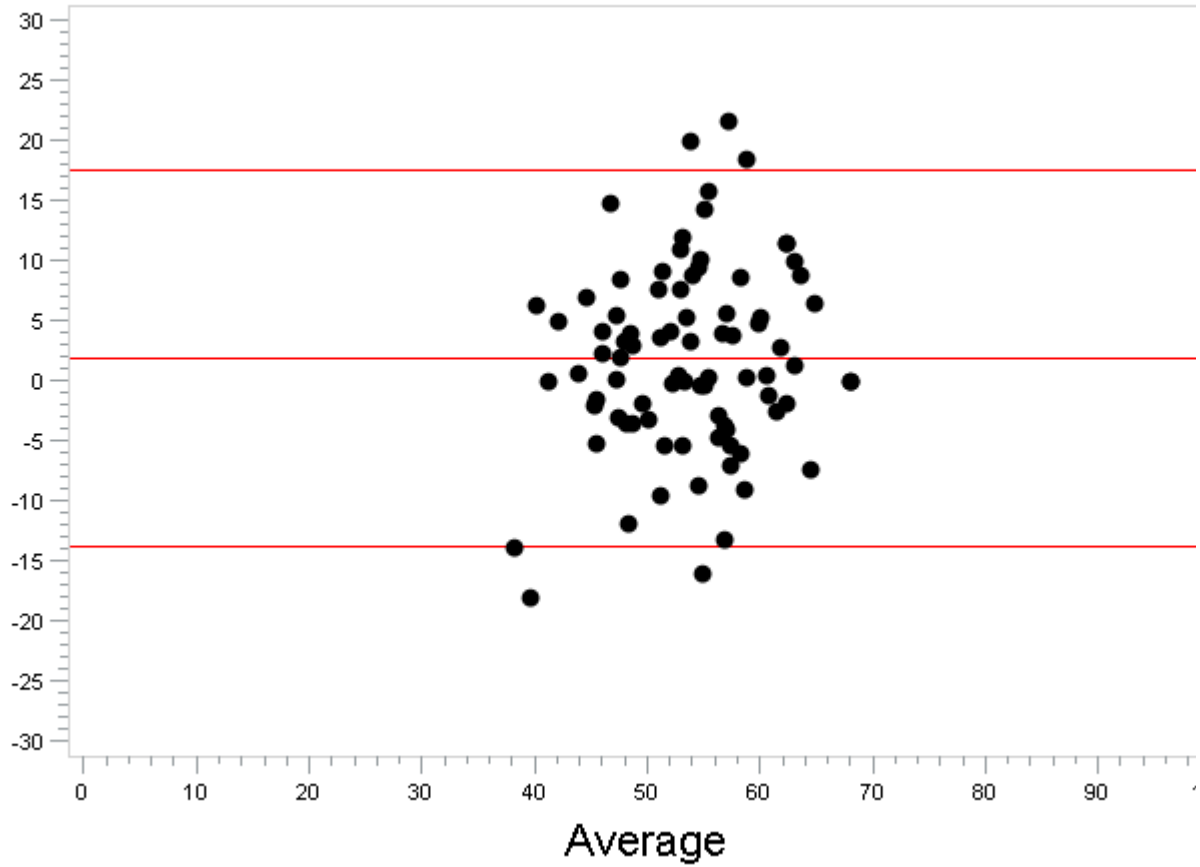

UL: 17.54

LL: -13.75

Mean Diff: 1.90

### Bland-Altman Plot

#### Satisfaction with Social Roles and Activities - short form

Difference

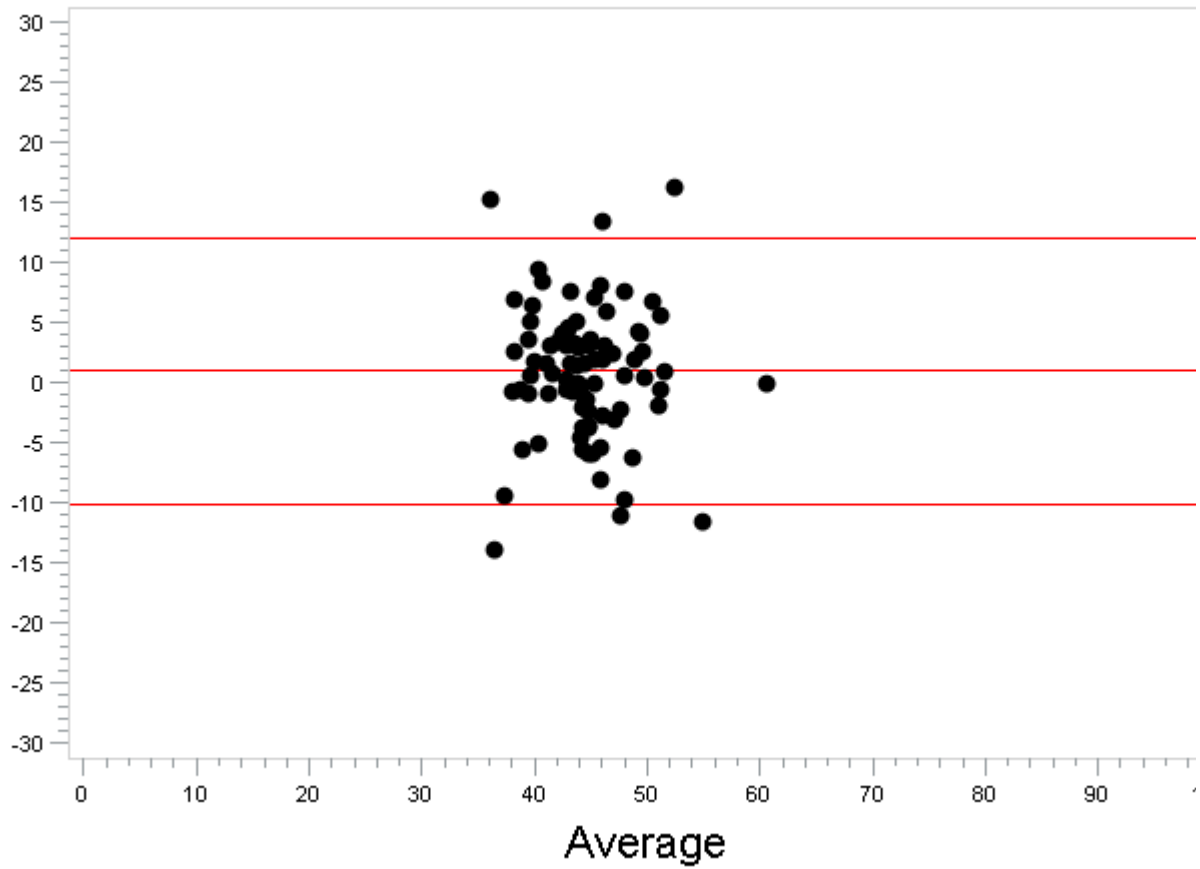

UL: 12.01

LL: -10.04

Mean Diff: 0.99

**Bland-Altman Plot**  
**Sleep Disturbance - short form**

Difference

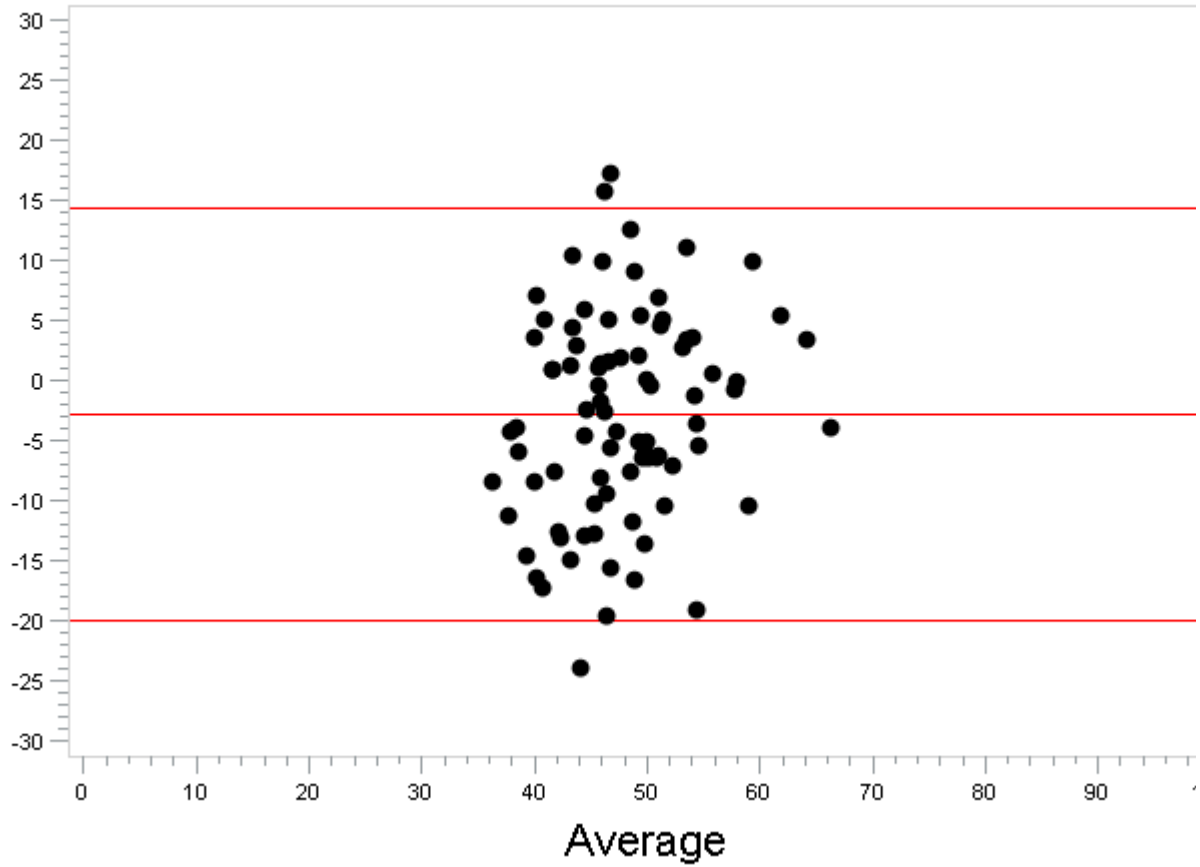

UL: 14.40

LL: -19.90

Mean Diff: -2.75

**Bland-Altman Plot**  
**Stigma - short form**

Difference

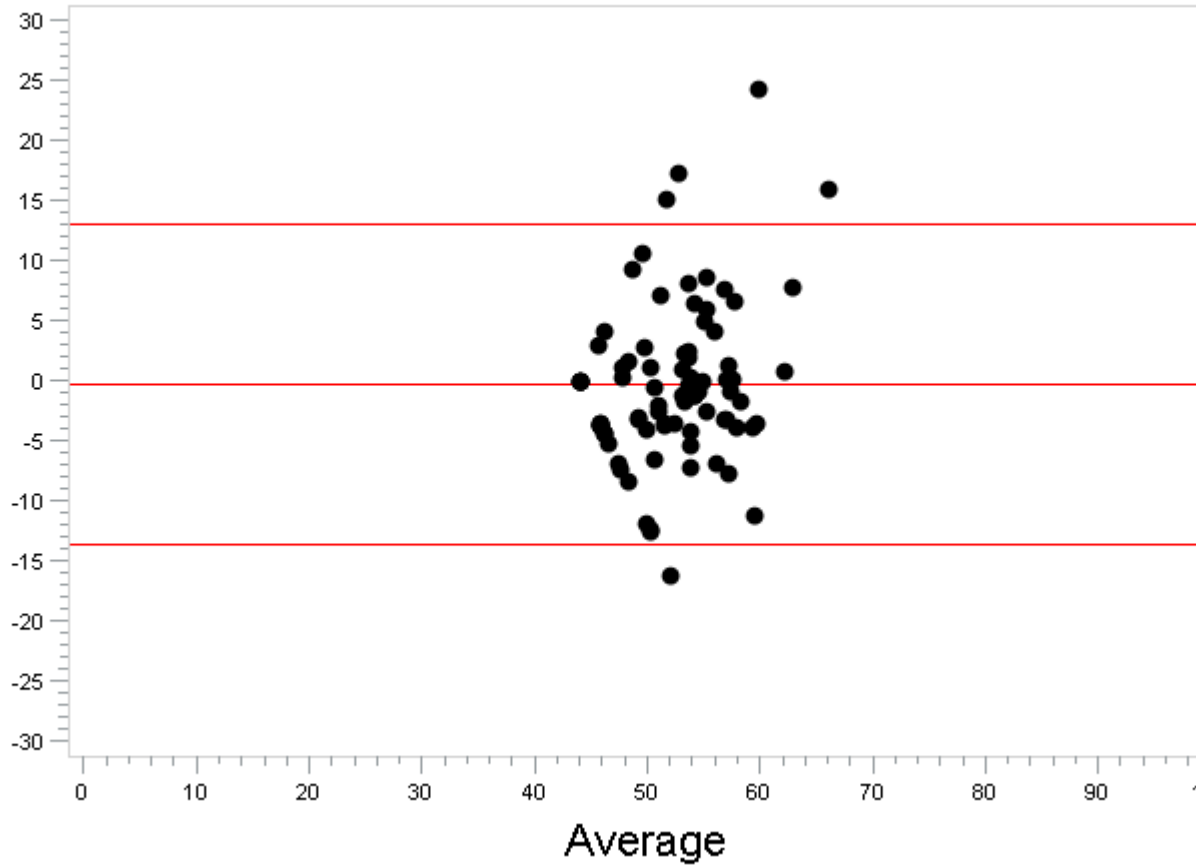

UL: 12.99

LL: -13.52

Mean Diff: -0.27

### Bland-Altman Plot

#### Upper Extremity (Fine Motor, ADL) - short form

Difference

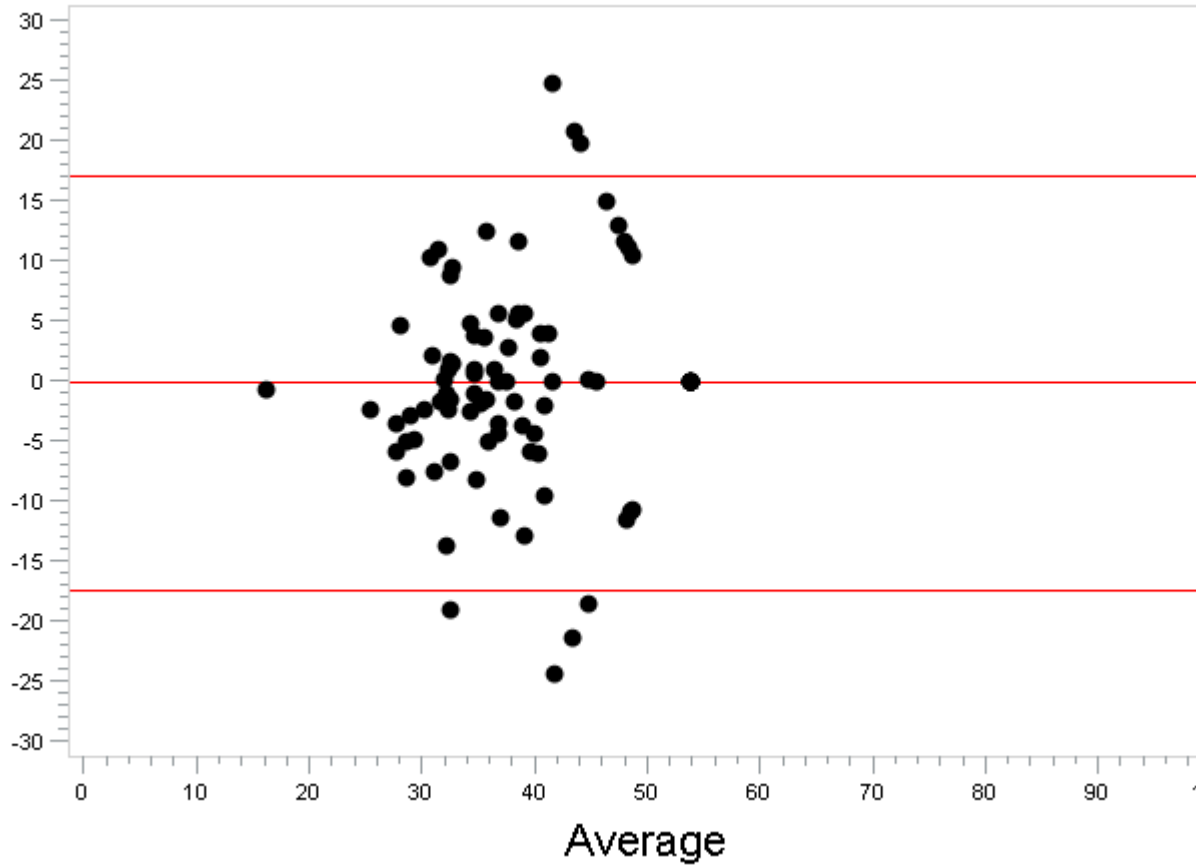

UL: 17.12

LL: -17.44

Mean Diff: -0.16

### Bland-Altman Plot

### Applied Cognition- Executive Function - extended form

Difference

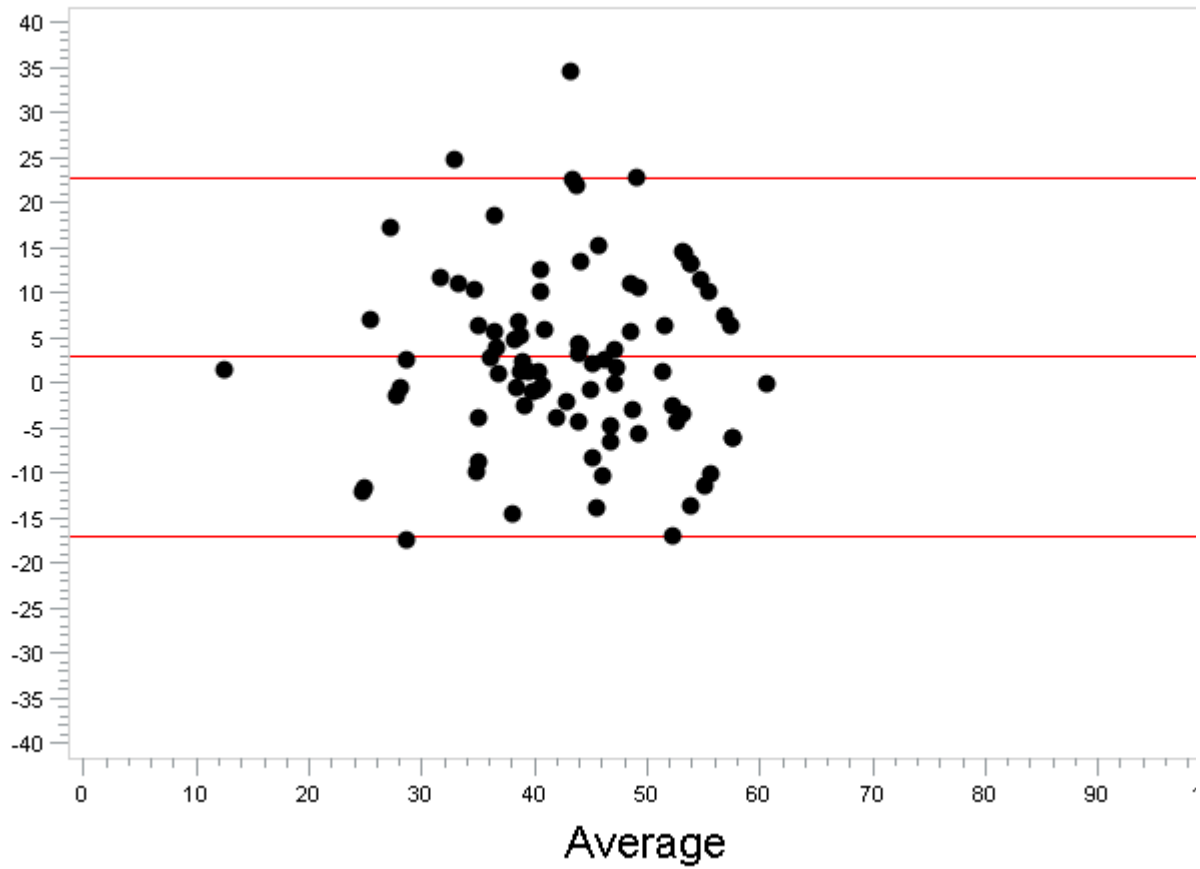

UL: 22.82

LL: -17.11

Mean Diff: 2.85

### Bland-Altman Plot

#### Applied Cognition- General Concerns - extended form

Difference

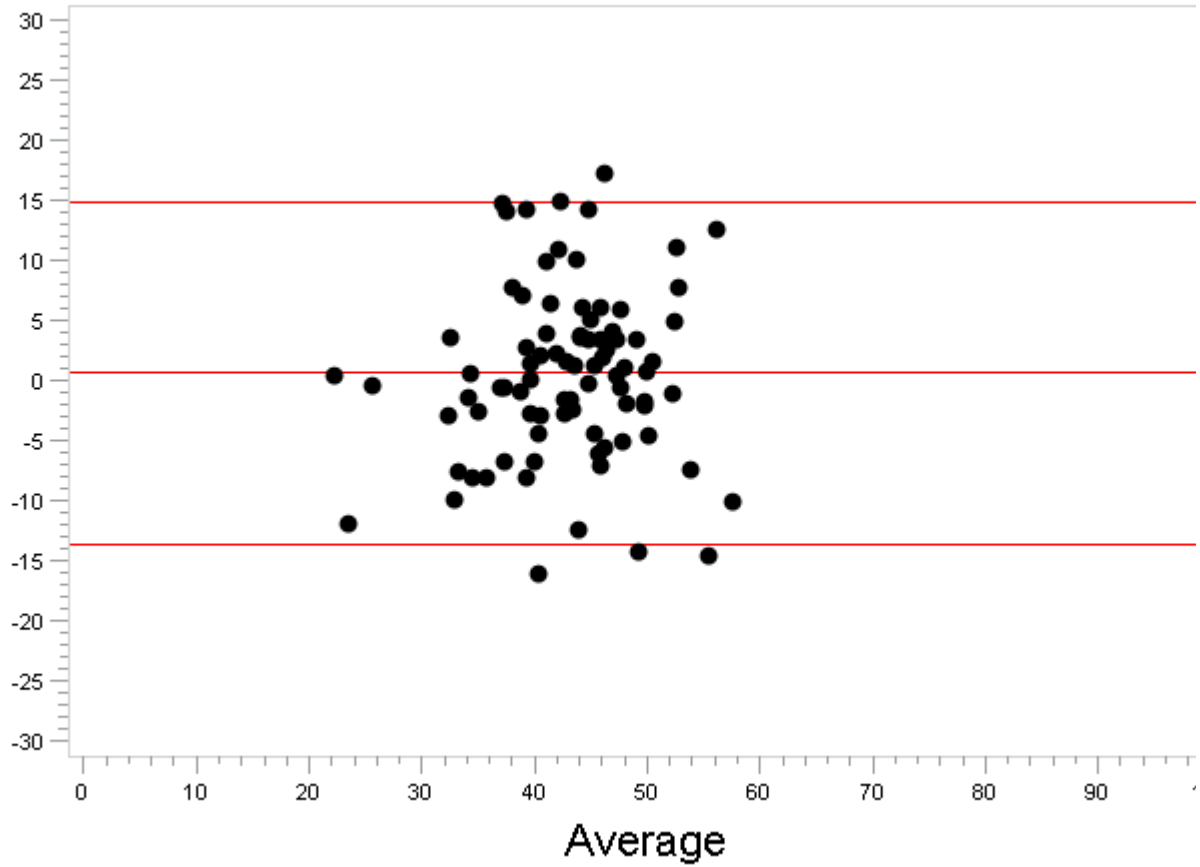

UL:14.95

LL: -13.59

Mean Diff: 0.68



### Bland-Altman Plot

### Emotional and Behavioral Dyscontrol - extended form

Difference

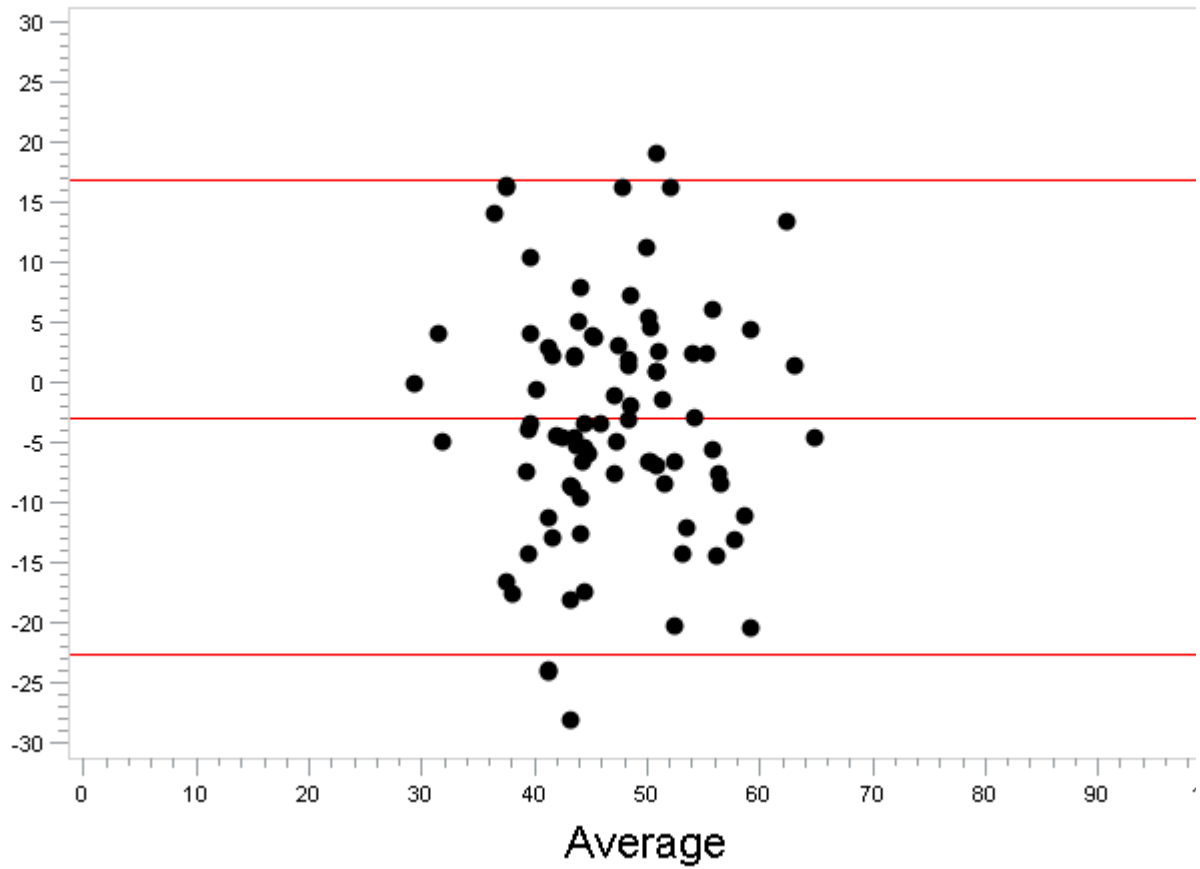

UL: 16.83

LL: -22.66

Mean Diff: -2.91

**Bland-Altman Plot**  
**Fatigue - extended form**

Difference

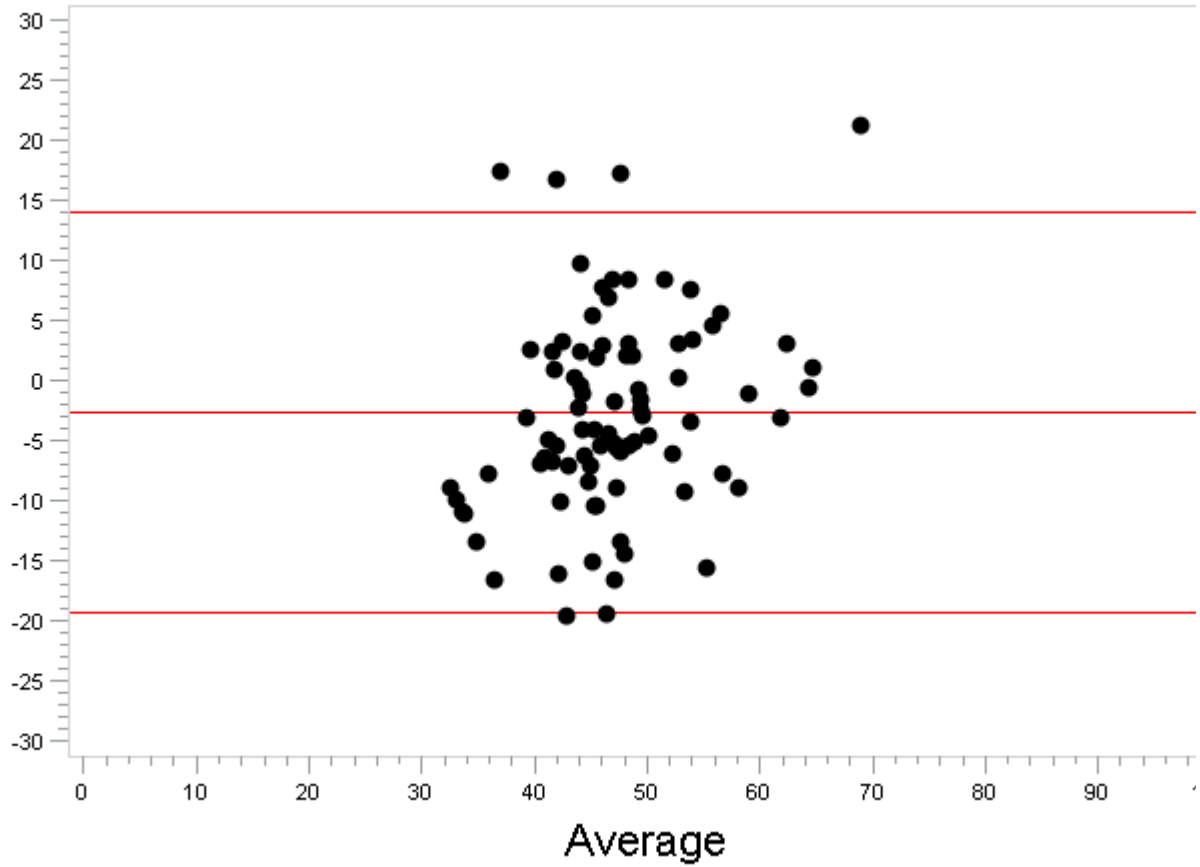

UL: 14.96

LL: -19.086

Mean Diff: -2.06

### Bland-Altman Plot

#### Lower Extremity (Mobility) - extended form

Difference

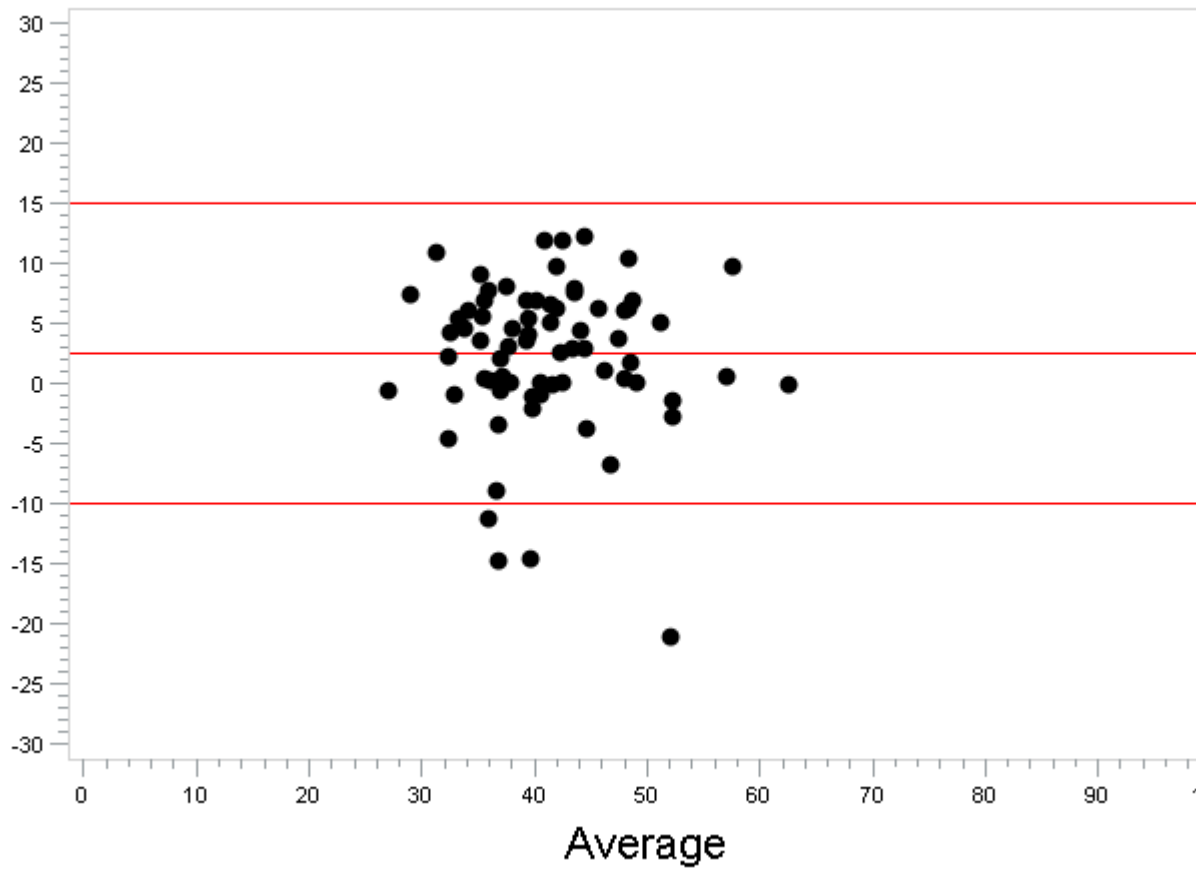

UL: 15.02

LL: -9.98

Mean Diff: 2.52

### Bland-Altman Plot

#### Upper Extremity (Fine Motor, ADL) - extended form

Difference

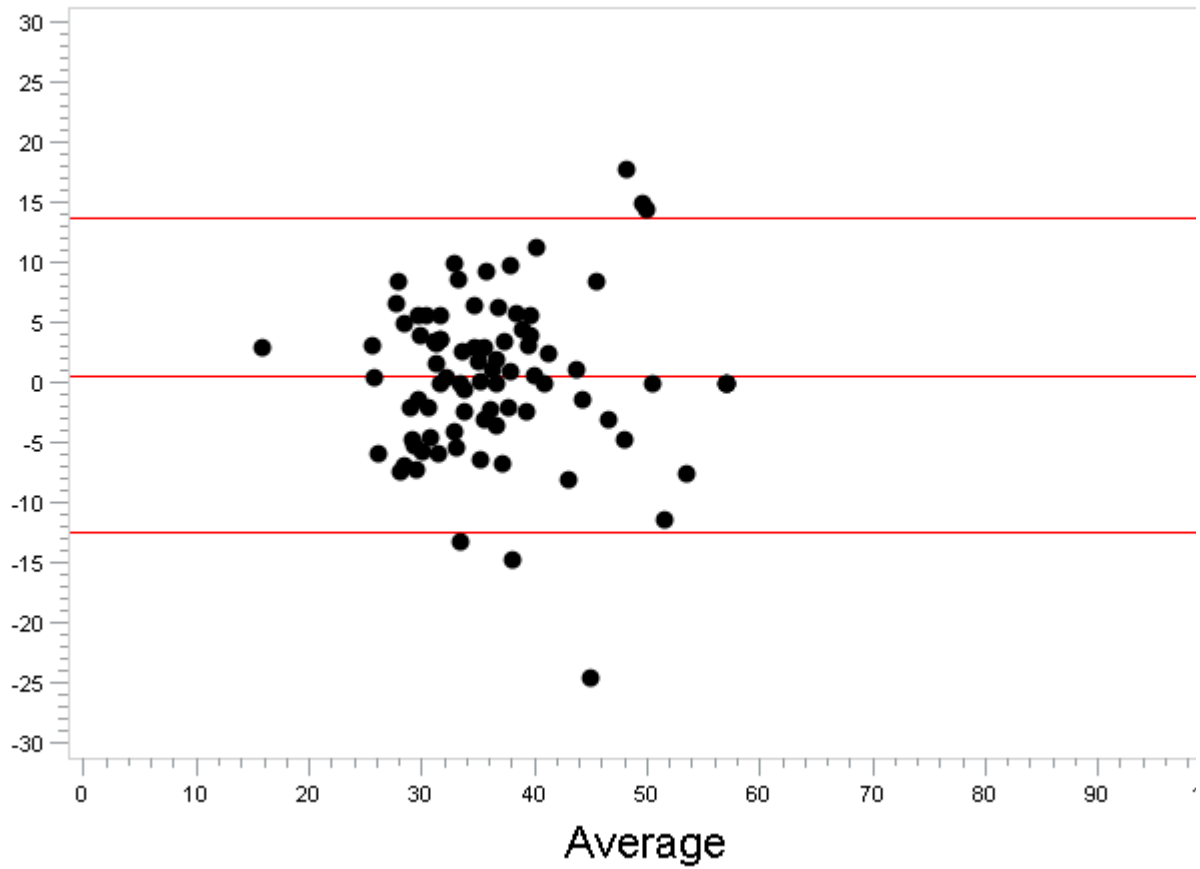

UL: 13.73

LL: -12.47

Mean Diff: 0.63

**Online Supplement Table S2:** Neuro-QoL Short Form Item-level Patient-Proxy Agreement for Sample of Community-Dwelling Persons with Stroke.

Kappa coefficients measure agreement based on observed response frequencies above that accounted for by chance. For rating scales with more than two options (i.e., dichotomous), kappa is weighted higher for ratings that are the same, and progressively lower for ratings that differ by larger values. Kappa values range between 0 and 1. Although the Neuro-QoL short form rating scale anchors vary, the rating scale values range from 1 to 5 (online supplement Table S1). Thus, weighted kappa coefficients are estimated from a cross-tabulation table where the patient-proxy agreement is weighted highest on the diagonal cells, and less on the off-diagonals. We have not interpreted the absolute weighted kappa values because the Neuro-QoL short forms are intended for scoring and interpretation at the summary score level. Relatively, the best agreement was observed for the item “How much DIFFICULTY do you currently have... keeping important personal papers such as bills, insurance documents and tax forms organized?” from the **Applied Cognition - Executive Function – Short Form** ( $\kappa_w=0.34$ ,  $p<0.001$ ). The poorest level of agreement was observed for numerous items that had non-significant p-values, which are reported with red text.

For each item in each of the 13 Neuro-QoL adult short forms, the table reports the item text, the number (n) of cases with patient and proxy responses, the weighted kappa ( $\kappa_w$ ) coefficients, and the corresponding p-values. Note that values reported in **red text** indicate non-significant coefficients ( $p\geq.05$ ). The short forms that have the fewest items with non-significant kappa coefficients are presented first, as follows:

**Lower Extremity Function (Mobility) – Short Form**

| Item Code | Items                                                                      | n  | $\kappa_w$ | p-value |
|-----------|----------------------------------------------------------------------------|----|------------|---------|
| PFC45     | Are you able to get on and off the toilet?                                 | 69 | .264       | .002    |
| PFA30     | Are you able to step up and down curbs?                                    | 70 | .245       | <.001   |
| PFA56     | Are you able to get in and out of a car?                                   | 71 | .158       | .043    |
| PFA45     | Are you able to get out of bed into a chair?                               | 70 | .080       | .251    |
| PFA12     | Are you able to push open a heavy door?                                    | 72 | .126       | .044    |
| PFA53     | Are you able to run errands and shop?                                      | 69 | .226       | <.001   |
| PFA31     | Are you able to get up off the floor from lying on your back without help? | 70 | .212       | <.001   |
| PFA23     | Are you able to go for a walk of at least 15 minutes?                      | 70 | .255       | <.001   |

### Applied Cognition - General Concerns – Short Form

| Item Code | Items<br>Stem: In the past 7 days...                                                 | n  | K <sub>w</sub> | p-value |
|-----------|--------------------------------------------------------------------------------------|----|----------------|---------|
| NQCOG64   | I had to read something several times to understand it                               | 84 | .183           | .003    |
| NQCOG65   | I had trouble keeping track of what I was doing if I was interrupted                 | 83 | .227           | <.001   |
| NQCOG66   | I had difficulty doing more than one thing at a time                                 | 85 | .152           | .012    |
| NQCOG68   | I had trouble remembering new information, like phone numbers or simple instructions | 83 | .129           | .038    |
| NQCOG72   | I had trouble thinking clearly                                                       | 83 | .234           | .001    |
| NQCOG75   | My thinking was slow                                                                 | 84 | .136           | .034    |
| NQCOG77   | I had to work really hard to pay attention or I would make a mistake                 | 83 | .195           | .002    |
| NQCOG80   | I had trouble concentrating                                                          | 84 | .035           | .576    |

### Applied Cognition - Executive Function – Short Form

| Item Code | Items<br>Stem: How much DIFFICULTY do you currently have...                                                                                                             | n  | K <sub>w</sub> | p-value |
|-----------|-------------------------------------------------------------------------------------------------------------------------------------------------------------------------|----|----------------|---------|
| NQCOG16   | checking the accuracy of financial documents, (e.g., bills, checkbook, or bank statements)?                                                                             | 85 | .276           | <.001   |
| NQCOG17   | counting the correct amount of money when making purchases?                                                                                                             | 85 | .187           | .009    |
| NQCOG22   | reading and following complex instructions (e.g., directions for a new medication)?                                                                                     | 84 | .131           | .056    |
| NQCOG24   | planning for and keeping appointments that are not part of your weekly routine, (e.g., a therapy or doctor appointment, or a social gathering with friends and family)? | 84 | .272           | <.001   |
| NQCOG25   | managing your time to do most of your daily activities?                                                                                                                 | 85 | .151           | .030    |
| NQCOG27   | taking care of complicated tasks like managing a checking account or getting appliances fixed?                                                                          | 85 | .188           | .003    |
| NQCOG28   | keeping important personal papers such as bills, insurance documents and tax forms organized?                                                                           | 84 | .338           | <.001   |
| NQCOG40   | learning new tasks or instructions?                                                                                                                                     | 82 | .113           | .090    |

### Ability to Participate in Social Roles and Activities – Short Form

| Item Code | Items<br>Stem: In the past 7 days...                               | n  | K <sub>w</sub> | p-value |
|-----------|--------------------------------------------------------------------|----|----------------|---------|
| NQPRF01   | I can keep up with my family responsibilities                      | 84 | .077           | .197    |
| NQPRF03   | I am able to do all of my regular family activities                | 84 | .144           | .011    |
| NQPRF08   | I am able to socialize with my friends                             | 85 | .205           | .002    |
| NQPRF09   | I am able to do all of my regular activities with friends          | 81 | .133           | .020    |
| NQPRF17   | I can keep up with my social commitments                           | 82 | .122           | .042    |
| NQPRF26   | I am able to participate in leisure activities                     | 84 | .133           | .022    |
| NQPRF32   | I am able to perform my daily routines.....                        | 85 | .064           | .343    |
| NQPRF34   | I can keep up with my work responsibilities (include work at home) | 80 | .185           | .002    |

### Depression – Short Form

| Item Code | Items<br>Stem: In the past 7 days...  | n  | K <sub>w</sub> | p-value |
|-----------|---------------------------------------|----|----------------|---------|
| EDDEP29   | I felt depressed                      | 84 | .200           | .002    |
| EDDEP41   | I felt hopeless                       | 84 | .130           | .064    |
| EDDEP09   | I felt that nothing could cheer me up | 84 | .179           | .011    |
| EDDEP48   | I felt that my life was empty         | 83 | .186           | .007    |
| EDDEP04   | I felt worthless                      | 84 | .177           | .011    |
| EDDEP36   | I felt unhappy                        | 85 | .033           | .608    |
| EDDEP39   | I felt I had no reason for living     | 84 | .170           | .008    |
| EDDEP45   | I felt that nothing was interesting   | 85 | .203           | .004    |

### Upper Extremity Function (Fine Motor, ADL) – Short Form

| Item Code | Items<br>No Stem                                             | n  | K <sub>w</sub> | p-value |
|-----------|--------------------------------------------------------------|----|----------------|---------|
| PFA40     | Are you able to turn a key in a lock?                        | 84 | .263           | <.001   |
| PFA50     | Are you able to brush your teeth?                            | 84 | .096           | .229    |
| NQUEX44   | Are you able to make a phone call using a touch tone keypad? | 85 | .105           | .210    |
| PFB21     | Are you able to pick up coins from a table top?              | 83 | .121           | .102    |
| PFA43     | Are you able to write with a pen or pencil?                  | 85 | .216           | .002    |
| PFA35     | Are you able to open and close a zipper?...                  | 84 | .223           | <.001   |
| PFA55     | Are you able to wash and dry your body?                      | 85 | .276           | <.001   |
| PFB26     | Are you able to shampoo your hair                            | 86 | .239           | <.001   |

### Stigma – Short Form

| Item Code | Items<br>Stem: Lately...                                        | n  | K <sub>w</sub> | p-value |
|-----------|-----------------------------------------------------------------|----|----------------|---------|
| NQSTG02   | Because of my illness, some people avoided me                   | 84 | .055           | .426    |
| NQSTG04   | Because of my illness, I felt left out of things                | 84 | .088           | .170    |
| NQSTG 08  | Because of my illness, people avoided looking at me             | 83 | .298           | <.001   |
| NQSTG 16  | I felt embarrassed about my illness                             | 83 | .206           | .003    |
| NQSTG 01  | Because of my illness, some people seemed uncomfortable with me | 84 | .219           | .002    |
| NQSTG 17  | I felt embarrassed because of my physical limitations           | 84 | .151           | .015    |
| NQSTG05   | Because of my illness, people were unkind to me                 | 84 | .123           | .133    |
| NQSTG21   | Some people acted as though it was my fault I have this illness | 84 | .279           | <.001   |

### Sleep Disturbance – Short Form

| Item Code | Items<br>Stem: In the past 7 days...                                                                  | n  | K <sub>w</sub> | p-value |
|-----------|-------------------------------------------------------------------------------------------------------|----|----------------|---------|
| NQSLP02   | I had to force myself to get up in the morning                                                        | 85 | .020           | .751    |
| NQSLP03   | I had trouble stopping my thoughts at bedtime                                                         | 84 | .062           | .350    |
| NQSLP04   | I was sleepy during the daytime                                                                       | 85 | .111           | .057    |
| NQSLP05   | I had trouble sleeping because of bad dreams                                                          | 84 | .234           | .004    |
| NQSLP07   | I had difficulty falling asleep                                                                       | 85 | .173           | .008    |
| NQSLP12   | Pain woke me up                                                                                       | 85 | .241           | .001    |
| NQSLP13   | I avoided or cancelled activities with my friends because I was tired from having a bad night's sleep | 83 | .270           | .001    |
| NQSLP18   | I felt physically tense during the middle of the night or early morning hours                         | 84 | .095           | .207    |

### Positive Affect and Well-Being – Short Form

| Item Code | Items<br>Stem: Lately...                     | n  | K <sub>w</sub> | p-value |
|-----------|----------------------------------------------|----|----------------|---------|
| NQPPF14   | I had a sense of well-being                  | 84 | .096           | .126    |
| NQPPF12   | I felt hopeful                               | 84 | .112           | .097    |
| NQPPF15   | My life was satisfying                       | 84 | .077           | .225    |
| NQPPF20   | My life had purpose                          | 83 | .153           | .025    |
| NQPPF17   | My life had meaning                          | 84 | .198           | .004    |
| NQPPF22   | I felt cheerful                              | 83 | .070           | .270    |
| NQPPF19   | My life was worth living                     | 83 | .155           | .031    |
| NQPPF16   | I had a sense of balance in my life          | 83 | .040           | .505    |
| NQPPF07   | Many areas of my life were interesting to me | 83 | .109           | .086    |



### Satisfaction with Social Roles and Activities – Short Form

| Item Code | Items<br>Stem: In the past 7 days...                                    | n  | K <sub>w</sub> | p-value |
|-----------|-------------------------------------------------------------------------|----|----------------|---------|
| NQSAT 03  | I am bothered by my limitations in regular family activities            | 83 | .063           | .275    |
| NQSAT 23  | I am disappointed in my ability to socialize with my family             | 84 | .027           | .678    |
| NQSAT14   | I am bothered by limitations in my regular activities with friends      | 83 | .107           | .062    |
| NQSAT11   | I am disappointed in my ability to meet the needs of my friends         | 83 | .184           | .003    |
| SRPSAT33  | I am satisfied with my ability to do things for fun outside my home     | 83 | .095           | .060    |
| SRPSAT05  | I am satisfied with the amount of time I spend doing leisure activities | 83 | .025           | .656    |
| SRPSAT07  | I am satisfied with how much of my work I can do (include work at home) | 85 | .145           | .008    |
| NQSAT 46  | I am satisfied with my ability to do household chores or tasks          | 84 | .010           | .857    |

### Fatigue – Short Form

| Item Code | Items<br>Stem: In the past 7 days...                                | n  | K <sub>w</sub> | p-value |
|-----------|---------------------------------------------------------------------|----|----------------|---------|
| NQFTG13   | I felt exhausted                                                    | 85 | .021           | .733    |
| NQFTG11   | I felt that I had no energy                                         | 85 | .100           | .091    |
| NQFTG15   | I felt fatigued                                                     | 81 | .166           | .006    |
| NQFTG06   | I was too tired to do my household chores.                          | 79 | .085           | .003    |
| NQFTG07   | I was too tired to leave the house                                  | 81 | .119           | .063    |
| NQFTG10   | I was frustrated by being too tired to do the things I wanted to do | 85 | .060           | .320    |
| NQFTG14   | I felt tired                                                        | 84 | .060           | .297    |
| NQFTG02   | I had to limit my social activity because I was tired               | 84 | .116           | .055    |

### Anxiety – Short Form

| Item Code | Items<br>Stem: In the past 7 days...                | n  | K <sub>w</sub> | p-value |
|-----------|-----------------------------------------------------|----|----------------|---------|
| EDANX53   | I felt uneasy                                       | 85 | .042           | .493    |
| EDANX46   | I felt nervous                                      | 84 | .029           | .646    |
| EDANX48   | Many situations made me worry                       | 85 | .063           | .311    |
| EDANX41   | My worries overwhelmed me                           | 82 | .120           | .078    |
| EDANX54   | I felt tense                                        | 83 | .137           | .075    |
| EDANX55   | I had difficulty calming down                       | 83 | .111           | .096    |
| EDANX18   | I had sudden feelings of panic                      | 84 | .176           | .019    |
| NQANX07   | I felt nervous when my normal routine was disturbed | 83 | .110           | .099    |

### Emotional and Behavioral Dyscontrol – Short Form

| Item Code | Items<br>Stem: In the past 7 days...  | n  | K <sub>w</sub> | p-value |
|-----------|---------------------------------------|----|----------------|---------|
| EDANG42   | I had trouble controlling my temper   | 85 | .095           | .173    |
| NQPER05   | It was hard to control my behavior    | 85 | .116           | .149    |
| NQPER06   | I said or did things without thinking | 85 | .032           | .642    |
| NQPER07   | I got impatient with other people     | 85 | .054           | .415    |
| NQPER11   | I was irritable around other people   | 84 | .055           | .467    |
| NQPER12   | I was bothered by little things       | 83 | .176           | .010    |
| NQPER17   | I became easily upset                 | 85 | .041           | .532    |
| NQPER19   | I was in conflict with others         | 83 | .077           | .287    |

## Applied Cognition - Executive Function – Short Form

Please respond to each question or statement by marking one box per row.

**How much DIFFICULTY do you currently have...**

|         |                                                                                                                                                                              | None                          | A little                      | Somewhat                      | A lot                         | Cannot do                     |
|---------|------------------------------------------------------------------------------------------------------------------------------------------------------------------------------|-------------------------------|-------------------------------|-------------------------------|-------------------------------|-------------------------------|
| NQCOG16 | checking the accuracy of financial documents, (e.g., bills, checkbook, or bank statements)?.....                                                                             | <input type="checkbox"/><br>5 | <input type="checkbox"/><br>4 | <input type="checkbox"/><br>3 | <input type="checkbox"/><br>2 | <input type="checkbox"/><br>1 |
| NQCOG17 | counting the correct amount of money when making purchases?.....                                                                                                             | <input type="checkbox"/><br>5 | <input type="checkbox"/><br>4 | <input type="checkbox"/><br>3 | <input type="checkbox"/><br>2 | <input type="checkbox"/><br>1 |
| NQCOG22 | reading and following complex instructions (e.g., directions for a new medication)?.....                                                                                     | <input type="checkbox"/><br>5 | <input type="checkbox"/><br>4 | <input type="checkbox"/><br>3 | <input type="checkbox"/><br>2 | <input type="checkbox"/><br>1 |
| NQCOG24 | planning for and keeping appointments that are not part of your weekly routine, (e.g., a therapy or doctor appointment, or a social gathering with friends and family)?..... | <input type="checkbox"/><br>5 | <input type="checkbox"/><br>4 | <input type="checkbox"/><br>3 | <input type="checkbox"/><br>2 | <input type="checkbox"/><br>1 |
| NQCOG25 | managing your time to do most of your daily activities?.....                                                                                                                 | <input type="checkbox"/><br>5 | <input type="checkbox"/><br>4 | <input type="checkbox"/><br>3 | <input type="checkbox"/><br>2 | <input type="checkbox"/><br>1 |
| NQCOG27 | taking care of complicated tasks like managing a checking account or getting appliances fixed?.....                                                                          | <input type="checkbox"/><br>5 | <input type="checkbox"/><br>4 | <input type="checkbox"/><br>3 | <input type="checkbox"/><br>2 | <input type="checkbox"/><br>1 |
| NQCOG28 | keeping important personal papers such as bills, insurance documents and tax forms organized?.....                                                                           | <input type="checkbox"/><br>5 | <input type="checkbox"/><br>4 | <input type="checkbox"/><br>3 | <input type="checkbox"/><br>2 | <input type="checkbox"/><br>1 |
| NQCOG40 | learning new tasks or instructions?.....                                                                                                                                     | <input type="checkbox"/><br>5 | <input type="checkbox"/><br>4 | <input type="checkbox"/><br>3 | <input type="checkbox"/><br>2 | <input type="checkbox"/><br>1 |

## Applied Cognition - General Concerns – Short Form

Please respond to each question or statement by marking one box per row.

| In the past 7 days... |                                                                                           | Never                         | Rarely<br>(once)              | Sometimes<br>(2-3 times)      | Often<br>(once a<br>day)      | Very often<br>(several<br>times a<br>day) |
|-----------------------|-------------------------------------------------------------------------------------------|-------------------------------|-------------------------------|-------------------------------|-------------------------------|-------------------------------------------|
| NQCOG64               | I had to read something several times to understand it.....                               | <input type="checkbox"/><br>5 | <input type="checkbox"/><br>4 | <input type="checkbox"/><br>3 | <input type="checkbox"/><br>2 | <input type="checkbox"/><br>1             |
| NQCOG65               | I had trouble keeping track of what I was doing if I was interrupted.....                 | <input type="checkbox"/><br>5 | <input type="checkbox"/><br>4 | <input type="checkbox"/><br>3 | <input type="checkbox"/><br>2 | <input type="checkbox"/><br>1             |
| NQCOG66               | I had difficulty doing more than one thing at a time.....                                 | <input type="checkbox"/><br>5 | <input type="checkbox"/><br>4 | <input type="checkbox"/><br>3 | <input type="checkbox"/><br>2 | <input type="checkbox"/><br>1             |
| NQCOG68               | I had trouble remembering new information, like phone numbers or simple instructions..... | <input type="checkbox"/><br>5 | <input type="checkbox"/><br>4 | <input type="checkbox"/><br>3 | <input type="checkbox"/><br>2 | <input type="checkbox"/><br>1             |
| NQCOG72               | I had trouble thinking clearly.....                                                       | <input type="checkbox"/><br>5 | <input type="checkbox"/><br>4 | <input type="checkbox"/><br>3 | <input type="checkbox"/><br>2 | <input type="checkbox"/><br>1             |
| NQCOG75               | My thinking was slow.....                                                                 | <input type="checkbox"/><br>5 | <input type="checkbox"/><br>4 | <input type="checkbox"/><br>3 | <input type="checkbox"/><br>2 | <input type="checkbox"/><br>1             |
| NQCOG77               | I had to work really hard to pay attention or I would make a mistake.....                 | <input type="checkbox"/><br>5 | <input type="checkbox"/><br>4 | <input type="checkbox"/><br>3 | <input type="checkbox"/><br>2 | <input type="checkbox"/><br>1             |
| NQCOG80               | I had trouble concentrating.....                                                          | <input type="checkbox"/><br>5 | <input type="checkbox"/><br>4 | <input type="checkbox"/><br>3 | <input type="checkbox"/><br>2 | <input type="checkbox"/><br>1             |

## Anxiety – Short Form

Please respond to each question or statement by marking one box per row.

|         | In the past 7 days...                                       | Never                         | Rarely                        | Sometimes                     | Often                         | Always                        |
|---------|-------------------------------------------------------------|-------------------------------|-------------------------------|-------------------------------|-------------------------------|-------------------------------|
| EDANX53 | I felt uneasy.....                                          | <input type="checkbox"/><br>1 | <input type="checkbox"/><br>2 | <input type="checkbox"/><br>3 | <input type="checkbox"/><br>4 | <input type="checkbox"/><br>5 |
| EDANX46 | I felt nervous.....                                         | <input type="checkbox"/><br>1 | <input type="checkbox"/><br>2 | <input type="checkbox"/><br>3 | <input type="checkbox"/><br>4 | <input type="checkbox"/><br>5 |
| EDANX48 | Many situations made me worry.....                          | <input type="checkbox"/><br>1 | <input type="checkbox"/><br>2 | <input type="checkbox"/><br>3 | <input type="checkbox"/><br>4 | <input type="checkbox"/><br>5 |
| EDANX41 | My worries overwhelmed me.....                              | <input type="checkbox"/><br>1 | <input type="checkbox"/><br>2 | <input type="checkbox"/><br>3 | <input type="checkbox"/><br>4 | <input type="checkbox"/><br>5 |
| EDANX54 | I felt tense.....                                           | <input type="checkbox"/><br>1 | <input type="checkbox"/><br>2 | <input type="checkbox"/><br>3 | <input type="checkbox"/><br>4 | <input type="checkbox"/><br>5 |
| EDANX55 | I had difficulty calming<br>down.....                       | <input type="checkbox"/><br>1 | <input type="checkbox"/><br>2 | <input type="checkbox"/><br>3 | <input type="checkbox"/><br>4 | <input type="checkbox"/><br>5 |
| EDANX18 | I had sudden feelings of panic.....                         | <input type="checkbox"/><br>1 | <input type="checkbox"/><br>2 | <input type="checkbox"/><br>3 | <input type="checkbox"/><br>4 | <input type="checkbox"/><br>5 |
| NQANX07 | I felt nervous when my normal routine<br>was disturbed..... | <input type="checkbox"/><br>1 | <input type="checkbox"/><br>2 | <input type="checkbox"/><br>3 | <input type="checkbox"/><br>4 | <input type="checkbox"/><br>5 |

## Depression – Short Form

Please respond to each question or statement by marking one box per row.

|         | In the past 7 days...                      | Never                         | Rarely                        | Sometimes                     | Often                         | Always                        |
|---------|--------------------------------------------|-------------------------------|-------------------------------|-------------------------------|-------------------------------|-------------------------------|
| EDDEP29 | I felt depressed.....                      | <input type="checkbox"/><br>1 | <input type="checkbox"/><br>2 | <input type="checkbox"/><br>3 | <input type="checkbox"/><br>4 | <input type="checkbox"/><br>5 |
| EDDEP41 | I felt hopeless.....                       | <input type="checkbox"/><br>1 | <input type="checkbox"/><br>2 | <input type="checkbox"/><br>3 | <input type="checkbox"/><br>4 | <input type="checkbox"/><br>5 |
| EDDEP09 | I felt that nothing could cheer me up..... | <input type="checkbox"/><br>1 | <input type="checkbox"/><br>2 | <input type="checkbox"/><br>3 | <input type="checkbox"/><br>4 | <input type="checkbox"/><br>5 |
| EDDEP48 | I felt that my life was empty.....         | <input type="checkbox"/><br>1 | <input type="checkbox"/><br>2 | <input type="checkbox"/><br>3 | <input type="checkbox"/><br>4 | <input type="checkbox"/><br>5 |
| EDDEP04 | I felt worthless.....                      | <input type="checkbox"/><br>1 | <input type="checkbox"/><br>2 | <input type="checkbox"/><br>3 | <input type="checkbox"/><br>4 | <input type="checkbox"/><br>5 |
| EDDEP36 | I felt unhappy.....                        | <input type="checkbox"/><br>1 | <input type="checkbox"/><br>2 | <input type="checkbox"/><br>3 | <input type="checkbox"/><br>4 | <input type="checkbox"/><br>5 |
| EDDEP39 | I felt I had no reason for living.....     | <input type="checkbox"/><br>1 | <input type="checkbox"/><br>2 | <input type="checkbox"/><br>3 | <input type="checkbox"/><br>4 | <input type="checkbox"/><br>5 |
| EDDEP45 | I felt that nothing was interesting.....   | <input type="checkbox"/><br>1 | <input type="checkbox"/><br>2 | <input type="checkbox"/><br>3 | <input type="checkbox"/><br>4 | <input type="checkbox"/><br>5 |

## Emotional and Behavioral Dyscontrol – Short Form

Please respond to each question or statement by marking one box per row.

| <b>In the past 7 days...</b> |                                            | <b>Never</b>                  | <b>Rarely</b>                 | <b>Sometimes</b>              | <b>Often</b>                  | <b>Always</b>                 |
|------------------------------|--------------------------------------------|-------------------------------|-------------------------------|-------------------------------|-------------------------------|-------------------------------|
| EDANG42                      | I had trouble controlling my temper.....   | <input type="checkbox"/><br>1 | <input type="checkbox"/><br>2 | <input type="checkbox"/><br>3 | <input type="checkbox"/><br>4 | <input type="checkbox"/><br>5 |
| NQPER05                      | It was hard to control my behavior.....    | <input type="checkbox"/><br>1 | <input type="checkbox"/><br>2 | <input type="checkbox"/><br>3 | <input type="checkbox"/><br>4 | <input type="checkbox"/><br>5 |
| NQPER06                      | I said or did things without thinking..... | <input type="checkbox"/><br>1 | <input type="checkbox"/><br>2 | <input type="checkbox"/><br>3 | <input type="checkbox"/><br>4 | <input type="checkbox"/><br>5 |
| NQPER07                      | I got impatient with other people.....     | <input type="checkbox"/><br>1 | <input type="checkbox"/><br>2 | <input type="checkbox"/><br>3 | <input type="checkbox"/><br>4 | <input type="checkbox"/><br>5 |
| NQPER11                      | I was irritable around other people.....   | <input type="checkbox"/><br>1 | <input type="checkbox"/><br>2 | <input type="checkbox"/><br>3 | <input type="checkbox"/><br>4 | <input type="checkbox"/><br>5 |
| NQPER12                      | I was bothered by little things.....       | <input type="checkbox"/><br>1 | <input type="checkbox"/><br>2 | <input type="checkbox"/><br>3 | <input type="checkbox"/><br>4 | <input type="checkbox"/><br>5 |
| NQPER17                      | I became easily upset.....                 | <input type="checkbox"/><br>1 | <input type="checkbox"/><br>2 | <input type="checkbox"/><br>3 | <input type="checkbox"/><br>4 | <input type="checkbox"/><br>5 |
| NQPER19                      | I was in conflict with others.....         | <input type="checkbox"/><br>1 | <input type="checkbox"/><br>2 | <input type="checkbox"/><br>3 | <input type="checkbox"/><br>4 | <input type="checkbox"/><br>5 |

## Fatigue – Short Form

Please respond to each question or statement by marking one box per row.

| <b>In the past 7 days...</b> |                                                                          | <b>Never</b>                  | <b>Rarely</b>                 | <b>Sometimes</b>              | <b>Often</b>                  | <b>Always</b>                 |
|------------------------------|--------------------------------------------------------------------------|-------------------------------|-------------------------------|-------------------------------|-------------------------------|-------------------------------|
| NQFTG13                      | I felt exhausted.....                                                    | <input type="checkbox"/><br>1 | <input type="checkbox"/><br>2 | <input type="checkbox"/><br>3 | <input type="checkbox"/><br>4 | <input type="checkbox"/><br>5 |
| NQFTG11                      | I felt that I had no energy.....                                         | <input type="checkbox"/><br>1 | <input type="checkbox"/><br>2 | <input type="checkbox"/><br>3 | <input type="checkbox"/><br>4 | <input type="checkbox"/><br>5 |
| NQFTG15                      | I felt fatigued.....                                                     | <input type="checkbox"/><br>1 | <input type="checkbox"/><br>2 | <input type="checkbox"/><br>3 | <input type="checkbox"/><br>4 | <input type="checkbox"/><br>5 |
| NQFTG06                      | I was too tired to do my household chores.                               | <input type="checkbox"/><br>1 | <input type="checkbox"/><br>2 | <input type="checkbox"/><br>3 | <input type="checkbox"/><br>4 | <input type="checkbox"/><br>5 |
| NQFTG07                      | I was too tired to leave the house.....                                  | <input type="checkbox"/><br>1 | <input type="checkbox"/><br>2 | <input type="checkbox"/><br>3 | <input type="checkbox"/><br>4 | <input type="checkbox"/><br>5 |
| NQFTG10                      | I was frustrated by being too tired to do the things I wanted to do..... | <input type="checkbox"/><br>1 | <input type="checkbox"/><br>2 | <input type="checkbox"/><br>3 | <input type="checkbox"/><br>4 | <input type="checkbox"/><br>5 |
| NQFTG14                      | I felt tired.....                                                        | <input type="checkbox"/><br>1 | <input type="checkbox"/><br>2 | <input type="checkbox"/><br>3 | <input type="checkbox"/><br>4 | <input type="checkbox"/><br>5 |
| NQFTG02                      | I had to limit my social activity because I was tired.....               | <input type="checkbox"/><br>1 | <input type="checkbox"/><br>2 | <input type="checkbox"/><br>3 | <input type="checkbox"/><br>4 | <input type="checkbox"/><br>5 |



## Lower Extremity Function (Mobility) – Short Form

Please respond to each question or statement by marking one box per row.

|       |                                                                                 | Without<br>any<br>difficulty  | With a<br>little<br>difficulty | With some<br>difficulty       | With<br>much<br>difficulty    | Unable to<br>do               |
|-------|---------------------------------------------------------------------------------|-------------------------------|--------------------------------|-------------------------------|-------------------------------|-------------------------------|
| PFA45 | Are you able to get on and off the toilet?...                                   | <input type="checkbox"/><br>5 | <input type="checkbox"/><br>4  | <input type="checkbox"/><br>3 | <input type="checkbox"/><br>2 | <input type="checkbox"/><br>1 |
| PFA30 | Are you able to step up and down curbs?...                                      | <input type="checkbox"/><br>5 | <input type="checkbox"/><br>4  | <input type="checkbox"/><br>3 | <input type="checkbox"/><br>2 | <input type="checkbox"/><br>1 |
| PFA56 | Are you able to get in and out of a car?.....                                   | <input type="checkbox"/><br>5 | <input type="checkbox"/><br>4  | <input type="checkbox"/><br>3 | <input type="checkbox"/><br>2 | <input type="checkbox"/><br>1 |
| PFA45 | Are you able to get out of bed into a chair?.....                               | <input type="checkbox"/><br>5 | <input type="checkbox"/><br>4  | <input type="checkbox"/><br>3 | <input type="checkbox"/><br>2 | <input type="checkbox"/><br>1 |
| PFA12 | Are you able to push open a heavy door?..                                       | <input type="checkbox"/><br>5 | <input type="checkbox"/><br>4  | <input type="checkbox"/><br>3 | <input type="checkbox"/><br>2 | <input type="checkbox"/><br>1 |
| PFA53 | Are you able to run errands and shop?.....                                      | <input type="checkbox"/><br>5 | <input type="checkbox"/><br>4  | <input type="checkbox"/><br>3 | <input type="checkbox"/><br>2 | <input type="checkbox"/><br>1 |
| PFA31 | Are you able to get up off the floor from lying on your back without help?..... | <input type="checkbox"/><br>5 | <input type="checkbox"/><br>4  | <input type="checkbox"/><br>3 | <input type="checkbox"/><br>2 | <input type="checkbox"/><br>1 |
| PFA23 | Are you able to go for a walk of at least 15 minutes?.....                      | <input type="checkbox"/><br>5 | <input type="checkbox"/><br>4  | <input type="checkbox"/><br>3 | <input type="checkbox"/><br>2 | <input type="checkbox"/><br>1 |

## Positive Affect and Well-Being - Short Form

Please respond to each question or statement by marking one box per row.

|         | <b>Lately...</b>                                  | <b>Never</b>                  | <b>Rarely</b>                 | <b>Sometimes</b>              | <b>Often</b>                  | <b>Always</b>                 |
|---------|---------------------------------------------------|-------------------------------|-------------------------------|-------------------------------|-------------------------------|-------------------------------|
| NQPPF14 | I had a sense of well-being.....                  | <input type="checkbox"/><br>1 | <input type="checkbox"/><br>2 | <input type="checkbox"/><br>3 | <input type="checkbox"/><br>4 | <input type="checkbox"/><br>5 |
| NQPPF12 | I felt hopeful.....                               | <input type="checkbox"/><br>1 | <input type="checkbox"/><br>2 | <input type="checkbox"/><br>3 | <input type="checkbox"/><br>4 | <input type="checkbox"/><br>5 |
| NQPPF15 | My life was satisfying.....                       | <input type="checkbox"/><br>1 | <input type="checkbox"/><br>2 | <input type="checkbox"/><br>3 | <input type="checkbox"/><br>4 | <input type="checkbox"/><br>5 |
| NQPPF20 | My life had purpose.....                          | <input type="checkbox"/><br>1 | <input type="checkbox"/><br>2 | <input type="checkbox"/><br>3 | <input type="checkbox"/><br>4 | <input type="checkbox"/><br>5 |
| NQPPF17 | My life had meaning.....                          | <input type="checkbox"/><br>1 | <input type="checkbox"/><br>2 | <input type="checkbox"/><br>3 | <input type="checkbox"/><br>4 | <input type="checkbox"/><br>5 |
| NQPPF22 | I felt cheerful.....                              | <input type="checkbox"/><br>1 | <input type="checkbox"/><br>2 | <input type="checkbox"/><br>3 | <input type="checkbox"/><br>4 | <input type="checkbox"/><br>5 |
| NQPPF19 | My life was worth living.....                     | <input type="checkbox"/><br>1 | <input type="checkbox"/><br>2 | <input type="checkbox"/><br>3 | <input type="checkbox"/><br>4 | <input type="checkbox"/><br>5 |
| NQPPF16 | I had a sense of balance in my life.....          | <input type="checkbox"/><br>1 | <input type="checkbox"/><br>2 | <input type="checkbox"/><br>3 | <input type="checkbox"/><br>4 | <input type="checkbox"/><br>5 |
| NQPPF07 | Many areas of my life were interesting to me..... | <input type="checkbox"/><br>1 | <input type="checkbox"/><br>2 | <input type="checkbox"/><br>3 | <input type="checkbox"/><br>4 | <input type="checkbox"/><br>5 |

## Satisfaction with Social Roles and Activities – Short Form

Please respond to each question or statement by marking one box per row.

| <b>In the past 7 days...</b> |                                                                         | <b>Not at all</b>             | <b>A little bit</b>           | <b>Somewhat</b>               | <b>Quite a bit</b>            | <b>Very much</b>              |
|------------------------------|-------------------------------------------------------------------------|-------------------------------|-------------------------------|-------------------------------|-------------------------------|-------------------------------|
| NQSAT 03                     | I am bothered by my limitations in regular family activities .....      | <input type="checkbox"/><br>5 | <input type="checkbox"/><br>4 | <input type="checkbox"/><br>3 | <input type="checkbox"/><br>2 | <input type="checkbox"/><br>1 |
| NQSAT 23                     | I am disappointed in my ability to socialize with my family.....        | <input type="checkbox"/><br>5 | <input type="checkbox"/><br>4 | <input type="checkbox"/><br>3 | <input type="checkbox"/><br>2 | <input type="checkbox"/><br>1 |
| NQSAT14                      | I am bothered by limitations in my regular activities with friends..... | <input type="checkbox"/><br>5 | <input type="checkbox"/><br>4 | <input type="checkbox"/><br>3 | <input type="checkbox"/><br>2 | <input type="checkbox"/><br>1 |
| NQSAT11                      | I am disappointed in my ability to meet the needs of my friends .....   | <input type="checkbox"/><br>5 | <input type="checkbox"/><br>4 | <input type="checkbox"/><br>3 | <input type="checkbox"/><br>2 | <input type="checkbox"/><br>1 |

| <b>In the past 7 days...</b> |                                                                              | <b>Not at all</b>             | <b>A little bit</b>           | <b>Somewhat</b>               | <b>Quite a bit</b>            | <b>Very much</b>              |
|------------------------------|------------------------------------------------------------------------------|-------------------------------|-------------------------------|-------------------------------|-------------------------------|-------------------------------|
| SRPSAT33                     | I am satisfied with my ability to do things for fun outside my home.....     | <input type="checkbox"/><br>1 | <input type="checkbox"/><br>2 | <input type="checkbox"/><br>3 | <input type="checkbox"/><br>4 | <input type="checkbox"/><br>5 |
| SRPSAT05                     | I am satisfied with the amount of time I spend doing leisure activities..... | <input type="checkbox"/><br>1 | <input type="checkbox"/><br>2 | <input type="checkbox"/><br>3 | <input type="checkbox"/><br>4 | <input type="checkbox"/><br>5 |
| SRPSAT07                     | I am satisfied with how much of my work I can do (include work at home)..... | <input type="checkbox"/><br>1 | <input type="checkbox"/><br>2 | <input type="checkbox"/><br>3 | <input type="checkbox"/><br>4 | <input type="checkbox"/><br>5 |
| NQSAT 46                     | I am satisfied with my ability to do household chores or tasks.....          | <input type="checkbox"/><br>1 | <input type="checkbox"/><br>2 | <input type="checkbox"/><br>3 | <input type="checkbox"/><br>4 | <input type="checkbox"/><br>5 |

## Ability to Participate in Social Roles and Activities – Short Form

Please respond to each question or statement by marking one box per row.

| In the past 7 days... |                                                                        | Never                         | Rarely                        | Sometimes                     | Often                         | Always                        |
|-----------------------|------------------------------------------------------------------------|-------------------------------|-------------------------------|-------------------------------|-------------------------------|-------------------------------|
| NQPRF01               | I can keep up with my family responsibilities.....                     | <input type="checkbox"/><br>1 | <input type="checkbox"/><br>2 | <input type="checkbox"/><br>3 | <input type="checkbox"/><br>4 | <input type="checkbox"/><br>5 |
| NQPRF03               | I am able to do all of my regular family activities.....               | <input type="checkbox"/><br>1 | <input type="checkbox"/><br>2 | <input type="checkbox"/><br>3 | <input type="checkbox"/><br>4 | <input type="checkbox"/><br>5 |
| NQPRF08               | I am able to socialize with my friends.....                            | <input type="checkbox"/><br>1 | <input type="checkbox"/><br>2 | <input type="checkbox"/><br>3 | <input type="checkbox"/><br>4 | <input type="checkbox"/><br>5 |
| NQPRF09               | I am able to do all of my regular activities with friends.....         | <input type="checkbox"/><br>1 | <input type="checkbox"/><br>2 | <input type="checkbox"/><br>3 | <input type="checkbox"/><br>4 | <input type="checkbox"/><br>5 |
| NQPRF17               | I can keep up with my social commitments.....                          | <input type="checkbox"/><br>1 | <input type="checkbox"/><br>2 | <input type="checkbox"/><br>3 | <input type="checkbox"/><br>4 | <input type="checkbox"/><br>5 |
| NQPRF26               | I am able to participate in leisure activities.....                    | <input type="checkbox"/><br>1 | <input type="checkbox"/><br>2 | <input type="checkbox"/><br>3 | <input type="checkbox"/><br>4 | <input type="checkbox"/><br>5 |
| NQPRF32               | I am able to perform my daily routines.....                            | <input type="checkbox"/><br>1 | <input type="checkbox"/><br>2 | <input type="checkbox"/><br>3 | <input type="checkbox"/><br>4 | <input type="checkbox"/><br>5 |
| NQPRF34               | I can keep up with my work responsibilities (include work at home).... | <input type="checkbox"/><br>1 | <input type="checkbox"/><br>2 | <input type="checkbox"/><br>3 | <input type="checkbox"/><br>4 | <input type="checkbox"/><br>5 |

## Sleep Disturbance

Please respond to each question or statement by marking one box per row.

| In the past 7 days... |                                                                                                            | Never                         | Rarely                        | Sometimes                     | Often                         | Always                        |
|-----------------------|------------------------------------------------------------------------------------------------------------|-------------------------------|-------------------------------|-------------------------------|-------------------------------|-------------------------------|
| NQSLP02               | I had to force myself to get up in the morning.....                                                        | <input type="checkbox"/><br>1 | <input type="checkbox"/><br>2 | <input type="checkbox"/><br>3 | <input type="checkbox"/><br>4 | <input type="checkbox"/><br>5 |
| NQSLP03               | I had trouble stopping my thoughts at bedtime.....                                                         | <input type="checkbox"/><br>1 | <input type="checkbox"/><br>2 | <input type="checkbox"/><br>3 | <input type="checkbox"/><br>4 | <input type="checkbox"/><br>5 |
| NQSLP04               | I was sleepy during the daytime.....                                                                       | <input type="checkbox"/><br>1 | <input type="checkbox"/><br>2 | <input type="checkbox"/><br>3 | <input type="checkbox"/><br>4 | <input type="checkbox"/><br>5 |
| NQSLP05               | I had trouble sleeping because of bad dreams.....                                                          | <input type="checkbox"/><br>1 | <input type="checkbox"/><br>2 | <input type="checkbox"/><br>3 | <input type="checkbox"/><br>4 | <input type="checkbox"/><br>5 |
| NQSLP07               | I had difficulty falling asleep.....                                                                       | <input type="checkbox"/><br>1 | <input type="checkbox"/><br>2 | <input type="checkbox"/><br>3 | <input type="checkbox"/><br>4 | <input type="checkbox"/><br>5 |
| NQSLP12               | Pain woke me up.....                                                                                       | <input type="checkbox"/><br>1 | <input type="checkbox"/><br>2 | <input type="checkbox"/><br>3 | <input type="checkbox"/><br>4 | <input type="checkbox"/><br>5 |
| NQSLP13               | I avoided or cancelled activities with my friends because I was tired from having a bad night's sleep..... | <input type="checkbox"/><br>1 | <input type="checkbox"/><br>2 | <input type="checkbox"/><br>3 | <input type="checkbox"/><br>4 | <input type="checkbox"/><br>5 |
| NQSLP18               | I felt physically tense during the middle of the night or early morning hours.....                         | <input type="checkbox"/><br>1 | <input type="checkbox"/><br>2 | <input type="checkbox"/><br>3 | <input type="checkbox"/><br>4 | <input type="checkbox"/><br>5 |

## Upper Extremity Function (Fine Motor, ADL) – Short Form

Please respond to each question or statement by marking one box per row.

|         |                                                                    | Without<br>any<br>difficulty  | With a<br>little<br>difficulty | With some<br>difficulty       | With<br>much<br>difficulty    | Unable to<br>do               |
|---------|--------------------------------------------------------------------|-------------------------------|--------------------------------|-------------------------------|-------------------------------|-------------------------------|
| PFA40   | Are you able to turn a key in a lock?.....                         | <input type="checkbox"/><br>5 | <input type="checkbox"/><br>4  | <input type="checkbox"/><br>3 | <input type="checkbox"/><br>2 | <input type="checkbox"/><br>1 |
| PFA50   | Are you able to brush your teeth?.....                             | <input type="checkbox"/><br>5 | <input type="checkbox"/><br>4  | <input type="checkbox"/><br>3 | <input type="checkbox"/><br>2 | <input type="checkbox"/><br>1 |
| NQUEX44 | Are you able to make a phone call using a touch tone key-pad?..... | <input type="checkbox"/><br>5 | <input type="checkbox"/><br>4  | <input type="checkbox"/><br>3 | <input type="checkbox"/><br>2 | <input type="checkbox"/><br>1 |
| PFB21   | Are you able to pick up coins from a table top?.....               | <input type="checkbox"/><br>5 | <input type="checkbox"/><br>4  | <input type="checkbox"/><br>3 | <input type="checkbox"/><br>2 | <input type="checkbox"/><br>1 |
| PFA43   | Are you able to write with a pen or pencil?.....                   | <input type="checkbox"/><br>5 | <input type="checkbox"/><br>4  | <input type="checkbox"/><br>3 | <input type="checkbox"/><br>2 | <input type="checkbox"/><br>1 |
| PFA35   | Are you able to open and close a zipper?...                        | <input type="checkbox"/><br>5 | <input type="checkbox"/><br>4  | <input type="checkbox"/><br>3 | <input type="checkbox"/><br>2 | <input type="checkbox"/><br>1 |
| PFA55   | Are you able to wash and dry your body?..                          | <input type="checkbox"/><br>5 | <input type="checkbox"/><br>4  | <input type="checkbox"/><br>3 | <input type="checkbox"/><br>2 | <input type="checkbox"/><br>1 |
| PFB26   | Are you able to shampoo your hair?.....                            | <input type="checkbox"/><br>5 | <input type="checkbox"/><br>4  | <input type="checkbox"/><br>3 | <input type="checkbox"/><br>2 | <input type="checkbox"/><br>1 |

## Stigma-Short Form

Please respond to each question or statement by marking one box per row.

|          | Lately...                                                            | Never                         | Rarely                        | Sometimes                     | Often                         | Always                        |
|----------|----------------------------------------------------------------------|-------------------------------|-------------------------------|-------------------------------|-------------------------------|-------------------------------|
| NQSTG02  | Because of my illness, some people avoided me.....                   | <input type="checkbox"/><br>1 | <input type="checkbox"/><br>2 | <input type="checkbox"/><br>3 | <input type="checkbox"/><br>4 | <input type="checkbox"/><br>5 |
| NQSTG04  | Because of my illness, I felt left out of things.....                | <input type="checkbox"/><br>1 | <input type="checkbox"/><br>2 | <input type="checkbox"/><br>3 | <input type="checkbox"/><br>4 | <input type="checkbox"/><br>5 |
| NQSTG 08 | Because of my illness, people avoided looking at me.....             | <input type="checkbox"/><br>1 | <input type="checkbox"/><br>2 | <input type="checkbox"/><br>3 | <input type="checkbox"/><br>4 | <input type="checkbox"/><br>5 |
| NQSTG 16 | I felt embarrassed about my illness.....                             | <input type="checkbox"/><br>1 | <input type="checkbox"/><br>2 | <input type="checkbox"/><br>3 | <input type="checkbox"/><br>4 | <input type="checkbox"/><br>5 |
| NQSTG 01 | Because of my illness, some people seemed uncomfortable with me..... | <input type="checkbox"/><br>1 | <input type="checkbox"/><br>2 | <input type="checkbox"/><br>3 | <input type="checkbox"/><br>4 | <input type="checkbox"/><br>5 |
| NQSTG 17 | I felt embarrassed because of my physical limitations.....           | <input type="checkbox"/><br>1 | <input type="checkbox"/><br>2 | <input type="checkbox"/><br>3 | <input type="checkbox"/><br>4 | <input type="checkbox"/><br>5 |
| NQSTG05  | Because of my illness, people were unkind to me .....                | <input type="checkbox"/><br>1 | <input type="checkbox"/><br>2 | <input type="checkbox"/><br>3 | <input type="checkbox"/><br>4 | <input type="checkbox"/><br>5 |
| NQSTG21  | Some people acted as though it was my fault I have this illness..... | <input type="checkbox"/><br>1 | <input type="checkbox"/><br>2 | <input type="checkbox"/><br>3 | <input type="checkbox"/><br>4 | <input type="checkbox"/><br>5 |
